1 **FRONT MATTER**

2 **Title:** Disturbance Triggers Non-Linear Microbe-Environment Feedbacks

3

4 **Authors:** Aditi Sengupta<sup>1†</sup>, Sarah J. Fansler<sup>2†</sup>, Rosalie K. Chu<sup>3</sup>, Robert E. Danczak<sup>2</sup>, Vanessa  
5 A. Garayburu-Caruso<sup>2</sup>, Lupita Renteria<sup>2</sup>, Hyun-Seob Song<sup>4</sup>, Jason Toyoda<sup>3</sup>, Jacqueline Wells<sup>5</sup>,  
6 and James C. Stegen<sup>2\*</sup>

7

8 **Affiliations:**

9 <sup>1</sup>California Lutheran University, Thousand Oaks, CA

10 <sup>2</sup>Pacific Northwest National Laboratory, Ecosystem Science Team, Richland, WA

11 <sup>3</sup>Environmental Molecular Sciences Laboratory, Richland, WA

12 <sup>4</sup>University of Nebraska-Lincoln, Lincoln, NE

13 <sup>5</sup>Oregon State University, Corvallis, OR

14

15 †Denotes equal contribution

16 \*Correspondence: James.Stegen@pnl.gov

17

18 **Abstract**

19 Conceptual frameworks linking microbial community membership, properties, and processes  
20 with the environment and emergent function have been proposed but remain untested. Here we  
21 refine and test a recent conceptual framework using hyporheic zone sediments exposed to  
22 wetting/drying transitions. Throughout the system we found threshold-like responses to the  
23 duration of desiccation. Membership of the putatively active community--but not the whole  
24 community--responded due to enhanced deterministic selection (an emergent community  
25 property). Concurrently, the thermodynamic properties of organic matter became less favorable  
26 for oxidation (an environmental component) and respiration decreased (a microbial process).  
27 While these responses were step functions of desiccation, we observed continuous monotonic  
28 relationships among community assembly, respiration, and organic matter thermodynamics.  
29 Placing the results in context of our conceptual framework points to previously unrecognized  
30 internal feedbacks that are initiated by disturbance, mediated by thermodynamics, and that  
31 cause the impacts of disturbance to be dependent on the history of disturbance.

32

33 **MAIN TEXT**

34

35 **Introduction**

36 Given the influence of microbes over ecosystem function, deeper knowledge of microbe-  
37 environment relationships is needed to improve ecosystem models (1). In turn, there is strong  
38 interest in quantifying and predicting microbe-environment relationships such as defining  
39 microbial life history strategies as traits in ecosystem models (2), assessing microbial biomass  
40 stoichiometry distributions in response to changing resource environments (3), and evaluating  
41 the extent of microbial adaptation to changing environments and their role in biogeochemical  
42 processes (4). To enhance and synthesize understanding of microbe-environment interactions,  
43 it is useful to develop conceptual frameworks based on linkages among microbial characteristics

44 and ecosystem processes. Previous work has used such frameworks to improve mechanistic  
45 representation and predictive capacity of microbe-environment interactions in ecosystem  
46 models (5).

47

48 A recently developed framework by Hall et al. (6) poses a series of concepts that collectively  
49 define the intersection between microbial and ecosystem ecology. Their framework draws  
50 attention to causal relationships between microbial characteristics, environmental dynamics,  
51 and cumulative ecosystems processes with the potential to incorporate relevant mechanistic  
52 links into predictive ecosystem models. A powerful element of the Hall et al. (6) framework is  
53 that it applies to diverse systems spanning natural (7), host-associated (8), and built (9)  
54 environments as well as across spatiotemporal scales (10). While potentially very useful, the  
55 Hall et al. (6) framework has seen little direct use in terms of explicitly defining and evaluating  
56 the linkages within specific study systems (but see 3). To make full use of and continually  
57 improve the framework, it is necessary to consider different realizations and interpretations of  
58 the proposed linkages. In the following paragraphs we detail a modified interpretation of the  
59 framework (**Fig. 1**) to enable its application to microbial communities and biogeochemistry  
60 associated with hyporheic zone sediments experiencing hydrological disturbance. In turn, we  
61 use data from a controlled laboratory experiment to evaluate key linkages within the modified  
62 framework.

63

64 As in Hall et al. (6) we consider microbial membership to be directly influenced by environmental  
65 conditions (arrow 4, Fig.1) and to underlie community-level properties (arrow 1, Fig. 1).

66 Determining microbial membership is relatively straightforward, and uses culture-independent  
67 (11–14) and culture-dependent (15) techniques. Sequence-based assays using phylogenetic  
68 markers are routine, with DNA-based (total community members) and RNA-based (putatively  
69 active community members) (16–21) approaches providing the foundation to study community  
70 properties.

71

72 While community membership is relatively straightforward, the identification of community  
73 properties that are relevant to a given system and function is open to broader interpretation.  
74 Here we propose using the relative influences of deterministic and stochastic community  
75 assembly (22) as emergent properties of microbial communities that have implications for  
76 biogeochemical function (23) including in ecosystems experiencing environmental disturbance.  
77 Deterministic mechanisms are associated with systematic differences in reproductive success  
78 imposed by the biotic and/or abiotic environment, while stochastic mechanisms are associated  
79 with passive spatial movements of organisms and birth/death events that are not due to  
80 systematic differences across taxa in reproductive success (24, 25). The relative contributions  
81 of determinism and stochasticity can be inferred by coupling microbial community membership  
82 and phylogeny to ecological null models (22, 25–27).

83

84 We propose the relative contributions of determinism and stochasticity to be an emergent  
85 property that is greater than the sum of the individual components (i.e., taxa), and that is  
86 complementary to the community properties proposed by Hall et al. (6), such as biomass and  
87 gene expression. Note that here we conceptualize stochastic and deterministic events as

88 ecological community assembly processes and that the relative influences of these ecological  
89 processes as an emergent community property. The ecological processes of community  
90 assembly are distinct from 'microbial processes' associated with biogeochemical reactions. As  
91 an emergent property, the relative influence of determinism and stochasticity is the result of  
92 complex biotic and abiotic interactions (28) and also shapes cumulative microbial processes  
93 that impact ecosystem biogeochemical functions (23) (arrow 2, Fig.1). For example, a stronger  
94 influence of determinism over community assembly is hypothesized to cause higher respiration  
95 rates (a microbial processes) due to a larger contribution of well-adapted taxa (23).

96  
97 Analyses of microbial community assembly have been widely employed across environments  
98 including soil (24, 29–32), sediment (26, 33–35), marine (36, 37), riverine (38), gut (39), and  
99 engineered (40, 41) systems. Previous work has focused primarily on using DNA-derived  
100 membership and phylogenetic data to study whole-community assembly. In contrast, recent  
101 studies have also used an RNA-based approach to study the relative influence of stochasticity  
102 over the assembly of the putatively active portion of microbial communities (31, 42). This RNA-  
103 based approach is complementary to the DNA-based approach and may provide additional  
104 insights into shorter-term dynamic linkages between emergent community properties and  
105 microbial processes. Such linkages have not, however, been previously evaluated.

106  
107 The Hall et al. (6) framework proposes that microbial processes (e.g., respiration rate) are  
108 influenced by both microbial community properties and environmental factors. Here we propose  
109 a revision of this structure that includes bidirectional links between the environment and  
110 microbial processes (arrow 3, Fig. 1). Such bi-directional links between microbes and their  
111 environment are common (43–46), and in hyporheic zone sediments may be particularly tied to  
112 thermodynamic properties of organic matter (47) and influenced by hydrological disturbances  
113 that are common in such environments. For example, preferential use OM by microbial  
114 communities has potential to alter the thermodynamic properties of organic matter pools (33).  
115 This microbe-driven shift in the environment could then feedback to impact microbial  
116 metabolism due to the strong influence of OM thermodynamics on biogeochemical rates (34,  
117 48–50). Bi-directional feedback between environmental factors and microbial processes is,  
118 therefore, likely important to the link between microbial communities and ecosystem function.  
119 Fundamental knowledge of these feedbacks and how they are modulated by hydrologic  
120 disturbances in hyporheic zone sediments is largely unknown, however.

121  
122 Within ecosystems, mechanistic associations between environmental factors, microbial  
123 properties, and microbial processes underlie spatial and temporal distributions of  
124 biogeochemical rates (Fig. 1 arrow 5). The resulting distributions (e.g., of respiration rates)  
125 define cumulative system function and can be used to understand key phenomena such as  
126 biogeochemical hot spots and hot moments (51). Developing concepts and models to predict  
127 the influences of biogeochemical hot spots/moments is a major outstanding challenge. To  
128 facilitate progress, Bernhardt et al. (52) proposed grouping hot spots/moments into the concept  
129 of ecosystem control points that exert a disproportionate influence on ecosystem function.

130

131 While not called out explicitly in Bernhardt et al. (52), the control point concept is based on the  
132 distribution of biogeochemical rates through space and/or time. Focusing on the shape of rate  
133 distributions allows the notion of control points to be extended to the concept of control point  
134 influence (CPI; Fig. 1 arrow 5). The CPI is a quantitative measurement of the contribution of  
135 elevated biogeochemical rates in space and/or time to the net aggregated rate within a defined  
136 system (53). While proposed conceptually and studied via simulation in Arora et al. (53),  
137 empirical measurements of CPI are lacking. More generally, incorporating CPI into a modified  
138 version of the Hall et al. (6) framework (Fig. 1), provides an integrated conceptualization for how  
139 environmental factors, microbial properties, and microbial processes contribute to emergent  
140 system function.

141  
142 Some elements of our modified framework (Fig. 1) are generalizable across systems (e.g., CPI),  
143 while others (e.g., OM thermodynamics) may have different levels of relevance across different  
144 ecosystem types. Here we aim to generate fundamental knowledge of the linkages between  
145 microbial community and ecosystem function, as well as reveal how hydrologic disturbance may  
146 modify these linkages. We do so by studying the modified conceptual framework in context of  
147 variably inundated hyporheic zone sediments exposed to different drying/wetting dynamics.  
148 Hyporheic zones are biogeochemical active subsurface domains in river corridors through which  
149 surface water flows and can mix with groundwater (51, 52, 54). These zones can have  
150 disproportionate biogeochemical impacts on river corridors (54–58). Within variably inundated  
151 streams (59, 60), hyporheic zones experience extreme changes in environmental conditions,  
152 but the consequences of this variability for microbe-ecosystem linkages is poorly known.

153  
154 To mimic natural disturbances we subjected sediments to wetting-drying transitions and focused  
155 on a series of analyses tied to our modified framework. We specifically evaluated relationships  
156 between: (i) the relative influence of stochastic assembly as a community property and  
157 respiration rates as a microbial process (Fig. 1 arrow 2), and (ii) environmental features and  
158 both microbial properties (Fig. 1 arrow 4) and processes (Fig. 1 arrow 3) that underlie aggregate  
159 system function (Fig. 1 arrow 5). We hypothesized that: (i) Stronger influences of determinism  
160 result in well-adapted microbes that will generate higher respiration rates, (ii) Longer duration in  
161 an inundated state will result in greater influences of stochastic assembly--due to weaker  
162 ecological selection--and lower respiration rates following re-inundation due to relatively  
163 consistent abiotic conditions (61), and (iii) Microbial processes are facilitated by OM that is  
164 thermodynamically more favorable for oxidation, leading to an association between respiration  
165 rates and OM thermodynamics.

## 166 167 **Methods and Materials**

168 *Study site and sediment collection.* Hyporheic sediments were collected from the Columbia  
169 River shoreline (approximately 46.372411°N, 119.271695°W) in eastern Washington State (Fig  
170 S1) (34, 62–66) within the Hanford Site on January 14, 2019 at 9 am Pacific Standard Time.  
171 Samples were aseptically collected to a depth of 10 cm at five sub-sampling locations within a  
172 meter to form a composite sample that was sieved on site through a 2 mm sieve into a clean  
173 glass beaker. Sieved sediment was stored on blue ice for 30 min while being transported back

174 to the laboratory. Once back at the laboratory sediment was stored at 4 °C until processing into  
175 incubation vials (see below).

176

177 The sediments were subjected to increasing temporal environmental variance (as a function of  
178 periodic wetting and drying transitions) and evaluated for associations between microbial  
179 membership, microbial properties, microbial community assembly, OM chemistry, absolute  
180 respiration rate (represented in this study as O<sub>2</sub> consumption rates), and cumulative respiration  
181 rates represented as CPI. Aerobic respiration was chosen as the biogeochemical process since  
182 it influences global-scale energy and material fluxes (67), and because the hyporheic zone  
183 within the field system is predominantly aerobic (63, 68). Detailed experimental design and  
184 methods are provided in the following paragraphs.

185

186 *Experimental design.* Sediments used in the batch reactors were sourced from one  
187 homogenized sediment pool. In turn, 10 g of sediment from the homogenized pool was added to  
188 each reactor vial. The sample set was then split into two groups, one inundated and the other  
189 allowed to desiccate. These conditions were maintained for 23 days prior to the start of dynamic  
190 moisture manipulation, from January 29th to February 21st, 2019. This initial ‘preconditioning’  
191 period was used to avoid measuring the immediate impacts of sampling disturbance and to  
192 allow time for desiccation. All replicate reactors were maintained in the dark, shaking at 100  
193 rpm, at 21 °C and were covered with a gas permeable Breathe-Easy (Milli-Pore Sigma,  
194 Burlington, MA) membrane that allowed for gas exchange and drying. After the preconditioning  
195 period in which sediments were consistently inundated or allowed to continuously desiccate, the  
196 transition regimes (**Fig. 2**) were applied to the reactors starting on February 22nd, 2019. We  
197 refer to the time from Feb 22nd, 2019 onwards as the ‘transitions period’ for all treatments, even  
198 though some did not experience transitions between being inundated and dry. Each treatment  
199 had 6-7 replicates (detailed below). These regimes were designed around the number of  
200 wet/dry transitions experienced by sediments within a given treatment. Treatment regimes also  
201 caused variation in the cumulative number of days sediments were in a drying state. We  
202 imposed six different experimental treatment regimes (**Fig. 2**) as follows:

203

- 204 ● 0 Transitions and 0 days of desiccation: Sediments were maintained at field moisture  
205 conditions for the preconditioning and transitions periods. This treatment had 6  
206 replicates.
- 207 ● 1 Transition and 34 days of desiccation: Sediments were dry during the preconditioning  
208 and transitions periods, and transitioned once to the field moisture level prior to  
209 respiration estimation. This treatment had 6 replicates.
- 210 ● 2 Transitions and 4 days of desiccation: Sediments were held at field moisture levels for  
211 the preconditioning period and then for the first 7 days of the transitions period, then  
212 transitioned to a dried state for 4 days, and transitioned to field moisture conditions prior  
213 to respiration estimation. This treatment had 7 replicates.
- 214 ● 3 Transitions and 31 days of desiccation: Sediments were dry during the preconditioning  
215 period and the first 4 days of the transitions period, then transitioned to field moisture  
216 levels for three days, then transitioned to 4 days in a dried state, and transitioned again  
217 to field moisture levels prior to respiration estimation. This treatment had 7 replicates.



- 218       • 4 Transitions and 8 days of desiccation: Sediments were held at field moisture levels for  
219 the preconditioning period and transitioned to a dried state for the first 4 days of the  
220 transitions period, then transitioned to field moisture levels for 3 days, then transitioned  
221 to 4 days in a dried state, and transitioned to field moisture levels prior to respiration  
222 estimation. This treatment had 7 replicates.
- 223       • 5 Transitions and 27 days of desiccation: Sediments were dry during the preconditioning  
224 period and then transitioned to field moisture levels for the first 3 days of the transitions  
225 period, transitioned to a dried state for 2 days, transitioned to field moisture levels for 2  
226 days, transitioned to a dried state for 2 days, and transitioned to field moisture levels for  
227 3 days prior to respiration estimation. This treatment had 7 replicates.
- 228

229 To avoid modifying electrical conductivity across experimental treatments, sterile deionized  
230 water was added to reactors to achieve/maintain field moisture levels according to the defined  
231 wet/dry regimes detailed above. For reactors with sediments that were below field moisture  
232 levels, deionized water was added to achieve field moisture levels prior to respiration rate  
233 estimation. Changes in the total mass of reactors and volumes of water added during the course  
234 of the experiment are provided in Data file S1.

235

236 *Respiration rate measurements.* Laboratory incubations were performed in batch reactors to  
237 quantify dissolved oxygen consumption rates. Borosilicate glass vials (20 ml) (I-Chem™ Clear  
238 VOA Glass Vials, Thermo-Fisher, Waltham, MA) served as incubator reactors. Factory  
239 calibrated oxygen sensor spots (Part# 200001875, diameter = 0.5 cm, detection limit 15 ppb, 0  
240 – 100 % oxygen; PreSens GmbH, Regensburg, Germany) were adhered to the inner vials of the  
241 reactor prior to sediment addition. Detailed description of sensor adhesion and non-destructive  
242 measurements of DO consumption using these sensors is provided in Garayburo-Caruso et al.  
243 (49). Vials were grouped into six treatment regimes (explained in the previous section)  
244 representing inundation-drought transitions.

245

246 Sample processing and incubations were performed in a laboratory at  $21 \pm 1$  °C. The reactors  
247 were monitored for 2 hours, with measurement of dissolved oxygen (DO) concentration ( $\mu\text{mol}$   
248  $\text{L}^{-1}$ ) every 30 min. DO concentration in each bioreactor was measured with an oxygen optical  
249 meter (Fibox 3; PreSens GmbH) connected to a 2 mm polymer optical fiber lined up to sense  
250 the sensor dot every thirty minutes. Respiration rates ( $\mu\text{mol L}^{-1} \text{h}^{-1}$ ) were estimated as the slope  
251 of the linear regression between DO concentration and incubation time for each sample. Some  
252 non-linearity was observed in the relationship between DO concentration and time such that  
253 only the first 4 data points--time zero to 2 hours--were used to fit a linear function. The slope of  
254 the linear function was taken as an estimate of respiration rate.

255

256 *Microbial Analysis.* Post-incubation, the sediment slurry was transferred to centrifuge tubes  
257 (Item#28-108 Genesee Scientific) and centrifuged for 5 min at 3200 rcf and 20°C. The  
258 supernatant was removed and reserved for biogeochemistry analyses and sediment aliquots for  
259 DNA and RNA extraction were flash-frozen in liquid  $\text{N}_2$  and stored at  $-80$  °C. The extraction,  
260 purification, and sequencing of sediment microbial gDNA were performed according to  
261 published protocol (29). The extraction of RNA was performed using the Qiagen PowerSoil RNA

262 extraction kit (Qiagen, Germantown, MD). RNA was treated with DNase and quantified with a  
263 Qubit RNA kit (Thermo Fisher, Waltham, MA). An aliquot of the RNA extraction was used to  
264 generate cDNA using SuperScript™ IV First-Strand Synthesis System (Thermo Fisher  
265 Scientific, Waltham, MA). The 16S rRNA gene sequencing--for both gDNA and cDNA--followed  
266 the established protocol by The Earth Microbiome Project (94). Sequence pre-processing,  
267 operational taxonomic unit (OTU) assignment, and phylogenetic tree building were performed  
268 using an in-house pipeline, HUNDO (69). Sequences were deposited at NCBI's Sequence Read  
269 Archive PRJNA641165. The final sample count of gDNA and cDNA, respectively, for each  
270 treatment regime, after dropping samples following quality filtering and rarefaction, was 5 and 5  
271 (0 transition), 4 and 3 (1 transition), 5 and 4 (2 transitions), 7 and 6 (3 transitions), 7 and 6 (4  
272 transitions), and 7 and 5 (5 transitions). Rarefaction levels are provided below in the Statistics  
273 section.

274 *Biogeochemistry*. Reserved supernatant was filtered through a 0.22 µm polyethersulfone  
275 membrane filter (Millipore Sterivex) and an aliquot was immediately removed for non-purgeable  
276 organic carbon (NPOC) and the remainder was stored at -20C until further OM high resolution  
277 analysis was conducted (see below). NPOC was determined by acidifying an aliquot of sample  
278 with 15% by volume of 2N ultra-pure HCL (Optima grade, Fisher#A466-500). The acidified  
279 sample was sparged with carrier gas (zero air, Oxarc# X32070) for 5 minutes to remove the  
280 inorganic carbon component. The sparged sample was then injected into the TOC-L furnace of  
281 the Shimadzu combustion carbon analyzer TOC-L CSH/CSN E100V with ASI-L auto sampler at  
282 680°C using 150 µL injection volumes. The best 4 out of 5 injections replicates were averaged  
283 to get the final result. The NPOC organic carbon standard was made from potassium hydrogen  
284 phthalate solid (Nacalia Tesque, lot M7M4380). The calibration range was 0 to 70 ppm NPOC  
285 as carbon.

286 Fourier Transform Ion Cyclotron Resonance Mass Spectrometry (FTICR-MS) of post-incubation  
287 sediment slurry was conducted as per Danczak et al. (70). Sample processing, injection, and  
288 data acquisition, processing and analysis was performed as per scripts provided in Danczak et  
289 al. (70), with 'Start tolerance' in Formularity changed to 8. Ten samples were dropped due to  
290 poor calibration, resulting in 5 replicates for 0 transition, 4 replicates for 1 transition, 5 replicates  
291 for 2 transitions, 6 replicates for 3 transitions, and 5 replicates each for 4 and 5 transition  
292 regimes.

294 From the FTICR-MS data, as in previous work (32, 34, 47, 49), we followed LaRowe and Van  
295 Cappellen (71) to calculate the Gibbs free energy for the half reaction of organic carbon  
296 oxidation under standard conditions ( $\Delta G^0_{\text{Cox}}$ ). This calculation is based on elemental  
297 stoichiometries associated with molecular formulae assigned to individual molecules observed  
298 in the FTICR-MS data. The formulae assignments are part of the processing scripts described in  
299 (70). As in previous work (32, 34, 47, 49), we interpret larger values of  $\Delta G^0_{\text{Cox}}$  to indicate OM  
300 that is thermodynamically less favorable for oxidation by microbes. That is, larger values of  
301  $\Delta G^0_{\text{Cox}}$  indicate OM that provides less net energy to a microbial cell per oxidation event,  
302 assuming all else is equal. Given the large numbers of assigned formulae within each sample,  
303 this resulted in thousands of  $\Delta G^0_{\text{Cox}}$  estimates within each sample, from which we estimated  
304 mean  $\Delta G^0_{\text{Cox}}$  for each sample.

305

## 306 **Statistics.**

307 *Estimating influences of community assembly processes.* The relative influences of community  
308 assembly processes influencing microbial community membership are emergent properties that  
309 cannot be calculated/inferred directly from knowledge of membership. To evaluate assembly  
310 processes as a link between membership and microbial processes (reference framework  
311 graphic) it is necessary to quantitatively estimate the relative influences of these processes. To  
312 do so we use a well-established null modeling framework based on phylogenetic relationships  
313 among microbial taxa (22, 24, 25, 27). We refer the reader to these previous studies for details.  
314 In brief, randomizations were used to generate estimates of phylogenetic associations among  
315 microbial taxa for scenarios in which microbial communities were stochastically assembled.  
316 These stochastic (i.e., null) expectations were compared quantitatively to observed phylogenetic  
317 associations to estimate the  $\beta$ -Nearest Taxon Index ( $\beta$ NTI) (22). We used cDNA sequences  
318 rarefied to 27227 and gDNA sequences rarefied to 15106 sequences per sample to determine  
319 putatively active community and whole community  $\beta$ NTI values, respectively. Samples falling  
320 below these sequence counts were removed as indicated above in subsection *Microbial*  
321 *Analysis*. A  $\beta$ NTI value of 0 indicates no deviation between the stochastic expectation and the  
322 observed phylogenetic associations, thereby indicating the dominance of stochastic assembly  
323 processes. As  $\beta$ NTI deviates further from 0, there is an increasing influence of deterministic  
324 assembly processes that drive community membership away from the stochastic expectation.  
325  $\beta$ NTI values below -2 or above +2 indicate statistical significance, with negative and positive  
326 values indicating less than or more than expected shifts in membership.  $\beta$ NTI is a pairwise  
327 metric measured between any two communities/samples, such that shifts in membership are  
328 related to changes between the pair of communities being evaluated. We used  $\beta$ NTI to study all  
329 pairwise community comparisons within each experimental treatment. Each community from a  
330 given reactor is therefore associated with multiple  $\beta$ NTI values due to being compared to  
331 communities associated with other replicate reactors. In turn, the average  $\beta$ NTI was calculated  
332 for each reactor. As in Stegen et al. (25), this provides a community-specific value for  $\beta$ NTI and  
333 thus an estimate of the relative influences of stochastic and deterministic processes causing  
334 deviations between a given community and all other communities within the same experimental  
335 conditions (32). That is, the larger the absolute value of  $\beta$ NTI for a given community, the  
336 stronger the influence of deterministic assembly processes acting on that community (25). In  
337 turn, these community-specific estimates were related to reactor-specific measurements. For  
338 example, respiration rates were regressed against  $\beta$ NTI to evaluate the link between emergent  
339 properties (i.e., ecological assembly) and microbial processes (i.e., respiration rates).

340

341 *Evaluating relationships between microbial characteristics and environment.* Respiration rate  
342 distributions, absolute  $\beta$ NTI values, and  $\Delta G^0_{\text{Cox}}$  were summarized as box plots. Pairwise Mann-  
343 Whitney test was performed to evaluate statistical differences between reactor-specific  
344 measurements (e.g., respiration rates and thermodynamic properties) and treatment groups  
345 (cumulative dry and inundated days). Continuous bivariate relationships were evaluated with  
346 ordinary least squares regression. Prior to regression analyses, respiration rates were log-  
347 transformed due to non-linearities resulting from respiration being constrained to be at or above



348 zero. Prior to log-transformation, half the smallest non-zero rate was added to each rate to  
349 enable inclusion of rate estimates with a value of zero.

350

351 *Control point influence calculation.* To characterize respiration rate distributions we used the  
352 control point influence (CPI) metric. CPI was recently developed (53) and is defined as the  
353 fraction of cumulative function ( $R_{tot}$ ; e.g., total respiration rate) within a defined system that is  
354 contributed by individual rates that are above the system's median rate ( $R_{med}$ ). To define  
355 cumulative function one must first define the system being evaluated. In our study, all replicate  
356 batch reactors within a given experimental treatment were conceptualized as a representative  
357 set of samples from a larger system experiencing the experimental conditions.  $R_{tot}$  for each  
358 treatment was therefore estimated as the sum of respiration rates across a treatment's replicate  
359 reactors. CPI was estimated as the sum of respiration rates that fell above the median rate for a  
360 given treatment ( $R_{above}$ ) divided by  $R_{tot}$  for that treatment. That is,  $R_{above} = \sum_i^N R_i$ , where  $R_i$  are  
361 respiration rates from individual reactors that fell above  $R_{med}$ , and  $CPI = R_{above}/R_{tot}$ .

362

363 An important feature of CPI is that it makes no assumptions of distribution normality, and can be  
364 estimated for rate distributions of any form (e.g., unimodal, multimodal, Gaussian, skewed, etc.).  
365 In most cases, CPI is constrained to have a minimum value of 0.5 (for a perfectly normal  
366 distribution with no outliers) and asymptotically approach 1 as a maximum value (e.g., for  
367 heavily skewed distributions with a small number of very high rates). CPI therefore quantitatively  
368 estimates the biogeochemical contribution of places in space or points in time that have  
369 elevated biogeochemical rates.

370

## 371 **Results**

372

373 To link microbial membership to emergent microbial community properties (Fig. 1 arrow 1) we  
374 used null modeling to estimate the contributions of stochastic and deterministic community  
375 assembly. Results from the null models indicate a relatively balanced mixture of stochasticity  
376 and determinism for both the whole community (gDNA-based) and putatively active community  
377 (rRNA-based) (Fig. S2). More specifically, stochasticity and determinism each governed 50% of  
378 turnover in microbial membership for the whole community and 33% and 67%, respectively, for  
379 the putatively active community. The relative contributions of the two deterministic components  
380 (homogeneous and variable selection) were strongly imbalanced. Homogeneous selection was  
381 responsible for 94% and 91% of the deterministic component for the whole and putatively active  
382 communities, respectively. The contributions of homogeneous and variable selection to the  
383 deterministic component must sum to 1, such that the variable selection was responsible for 6%  
384 and 9% of the deterministic component for the whole and putatively active communities,  
385 respectively.

386

387 As shown in Figure 1 (arrow 2), we hypothesized a link between microbial community properties  
388 and microbial processes realized as a relationship between the strength of determinism and  
389 respiration rates. Such a relationship was not observed for the whole community (Fig. 3a), but  
390 we did observe a non-linear decreasing relationship between respiration rates and the absolute

391 value of  $\beta$ NTI for the putatively active community (Fig. 3b). The direction of this relationship  
392 (negative) was opposite of that expected.

393  
394 In our conceptual framework there are multiple ways in which connections among the  
395 environment, microbial properties, and microbial processes may be realized, in part due to the  
396 environment having multiple components relevant to our study (Fig. 1 arrows 3,4). More  
397 specifically, the environment was characterized here in terms of both disturbance (number of  
398 dry days; imposed by the experimental manipulation) and OM thermodynamics ( $\Delta G^0_{\text{Cox}}$ ; this is  
399 an emergent aspect of the environment).

400  
401 Disturbance influenced both microbial properties and processes. These influences appeared to  
402 be non-linear with experimental treatments associated with the two largest number of dry days  
403 (31 and 34) causing decreases in respiration rates (Fig. 4a) and stronger influences of  
404 deterministic homogeneous selection for the putatively active community (Fig. 4b). Disturbance  
405 had no clear influence on community assembly for the whole community (Figs. S3, S4a). Given  
406 the apparent binary nature of these results, we evaluated statistical significance by combining  
407 respiration rate data from treatments with 0-27 cumulative dry days and separately combining  
408 data from treatments with 31 or 34 cumulative dry days (Fig. S5). Respiration rates were  
409 significantly depressed in the treatments associated with 31 or 34 cumulative dry days ( $W = 5$ ,  $p$   
410  $< 0.001$ ). The  $\beta$ NTI data are non-independent due to being based on all pairwise comparisons  
411 within a treatment. Standard statistical tools are therefore not applicable for assigning statistical  
412 significance when comparing  $\beta$ NTI distributions. However, as shown in Figures 4b and S4b,  
413 there is an obvious shift to lower  $\beta$ NTI values for the putatively active community in the  
414 treatments with 31 or 34 cumulative dry days.

415  
416 The other aspect of the environment examined here (i.e., OM thermodynamics) also had  
417 significant relationships with both microbial processes (Fig. 1, arrow 3) and properties (Fig. 1,  
418 arrow 4). More specifically, respiration rates decreased significantly as a negative exponential  
419 function of increasing  $\Delta G^0_{\text{Cox}}$  ( $R^2 = 0.26$ ;  $p = 0.01$ ; Fig. 5a). This indicates a decrease in  
420 respiration rate as OM thermodynamic properties shifted towards lower favorability for oxidation  
421 (i.e., larger values of  $\Delta G^0_{\text{Cox}}$ ). Similarly, we found that the strength of deterministic assembly  
422 associated with the putatively active community increased linearly with  $\Delta G^0_{\text{Cox}}$  ( $R^2 = 0.46$ ;  $p <$   
423  $0.0001$ ; Fig. 5b). The strength of deterministic assembly associated with the whole community  
424 was unrelated to  $\Delta G^0_{\text{Cox}}$  ( $p = 0.64$ ) (Fig. S6).

425  
426 The conceptual model described in Figure 1 focuses primarily on connections among  
427 environmental and/or microbial attributes, but there are potentially important relationships within  
428 attribute categories. In particular, within the environmental category there is the potential for an  
429 influence of disturbance on OM thermodynamics. Such an effect was found for OM  
430 thermodynamics as measured by  $\Delta G^0_{\text{Cox}}$  (Fig. 5c). Using the same approach as for analyses  
431 described above, we combined data for treatments with 0-27 cumulative dry days and  
432 compared that distribution to data combined across treatments with 31 or 34 cumulative dry  
433 days. A Mann-Whitney test comparing these distributions confirmed a significant change in the  
434  $\Delta G^0_{\text{Cox}}$  distribution ( $W = 189$ ,  $p = < 0.001$ )(Fig. S7).

435  
436 The last component of the conceptual model considered here is the connection between  
437 microbial processes occurring in a given location and cumulative system function that  
438 aggregates across locations (Fig. 1, arrow 5). It is at the system level that the influence of  
439 biogeochemical hot spots (or hot moments) can be evaluated. We conceptualized an aggregate  
440 system as the collection of replicate batch reactors within a given experimental treatment.  
441 Based on this definition, we estimated control point influence (CPI) as a measurement for the  
442 influence of biogeochemical hot spots. We observed a large amount of variation in CPI across  
443 experimental treatments, but there was no clear, direct influence of the treatments on CPI (Fig.  
444 4). The largest value of CPI observed ( $> 0.9$ ) was associated with the treatment that imposed 31  
445 cumulative dry days. This treatment also had the lowest median respiration rates across all  
446 treatments (Fig. 4).

#### 447 448 **Discussion**

449 Mechanistic evaluation of microbe-environment interactions is fundamental to understanding  
450 microbe-mediated ecosystem function. Inspired by a microbe-environment-ecosystem  
451 framework proposed by Hall et al. (6) we proposed and evaluated a modified framework linking  
452 microbial characteristics (membership, emergent properties, processes), the environment  
453 (disturbance, OM thermodynamics), and cumulative ecosystem function (CPI) of hyporheic zone  
454 sediments. Our results provide clear support for the overall conceptual framework and further  
455 point to an iterative loop among OM thermodynamics, respiration rates, and microbial  
456 community assembly that can be initiated by externally-imposed disturbance. Furthermore, our  
457 results indicate that the iterative thermodynamics-assembly-respiration loop may be initiated  
458 through threshold-like impacts of disturbance that were observed only after 31 or more  
459 cumulative days of desiccation.

460  
461 We first evaluated emergent community properties as a function of microbial membership by  
462 studying the relative influences of stochasticity and determinism over community assembly.  
463 Taking this approach, we found fully balanced stochastic-deterministic influences over the whole  
464 community, in which each contributed to 50% of the variation in community composition. The  
465 relative influences of stochasticity and determinism have been quantified for many microbial  
466 systems and the estimates are highly variable (72, 73). In addition, within the deterministic  
467 component of assembly, homogeneous selection had a far greater influence than variable  
468 selection. Previous work has also observed a broad range of contributions from homogeneous  
469 and variable selection (63, 74–77). As such, the assembly-associated outcomes observed here  
470 for the whole community are not unexpected relative to previous work. Very few studies,  
471 however, have examined the relative influences of different assembly components over  
472 putatively active microbial communities.

473  
474 For the putatively active communities we found that across all treatments both stochasticity and  
475 determinism were important, though deterministic assembly had greater influence. This deviates  
476 quantitatively from the whole community in which the influences of stochasticity and  
477 determinism were more balanced. Consistent with the whole community results, however, was  
478 the dominance of homogeneous selection within the deterministic component of assembly. The

479 strong influence of homogeneous selection is likely due to selection-based constraints imposed  
480 by aspects of the experimental system that did not vary across treatments. For example,  
481 mineralogy is known to strongly influence microbial communities (35, 78–82) and was  
482 homogenized across the experimental batch reactors, thereby potentially imposing  
483 homogeneous selection on both the whole and putatively active communities.

484  
485 Our study uniquely evaluates null-model outcome of putatively-active community assemblies in  
486 hyporheic zone sediments, where homogeneous selection was further enhanced by our  
487 experimentally imposed hydrologic disturbances. Increased homogeneous selection in response  
488 to disturbance is consistent with previous work in a soil system. In the soil system, disturbance  
489 led to an immediate increase in homogeneous selection for the putatively active community  
490 (31). The strong influence of homogeneous selection on the putatively active community is not  
491 always observed, however, suggesting it may be tied to acute disturbance. That is, Jia et al.  
492 (42) recently found that within a natural soil chronosequence, variable selection was stronger for  
493 putatively-active communities while homogeneous selection influenced the whole community  
494 assembly. Our results combined with these previous studies indicate that community assembly  
495 of putatively-active members may be more closely linked to short-term environmental change  
496 than assembly of the whole community.

497  
498 In addition to being more sensitive to disturbance, we find that assembly of the putatively active  
499 community was more strongly tied to microbial processes (i.e., respiration rate), than was the  
500 whole community. A strong link between biogeochemical rates and the putatively active  
501 community is consistent with previous studies (83, 84). More specifically, we observed a  
502 negative relationship between respiration rate and absolute values of  $\beta$ NTI for the putatively  
503 active community, but no relationship for the whole community. The direction of this relationship  
504 is opposite to our hypothesis. While stronger selection should remove mal-adapted individuals,  
505 leading to higher biogeochemical rates (23), increased selection in our experiment was imposed  
506 by disturbance that appeared to directly suppress respiration rates due to desiccation (85, 86).  
507 The simultaneous suppression of respiration and imposition of stronger selection led to the  
508 negative relationship between respiration and the strength of selection. The lack of such  
509 relationships when considering the whole community indicates that a greater focus on assembly  
510 dynamics of putatively active communities could reveal new insights into the multi-component  
511 linkages among microbes, the environment, and function.

512  
513 Disturbance also impacted OM thermodynamics and respiration rates, potentially initiating an  
514 iterative loop among microbial assembly, microbial processes, and the abiotic environment. In  
515 this iterative loop the direction of causation between OM thermodynamics and microbial  
516 processes (Fig. 1, arrow 3) is not clear due to feedbacks, though we interpret a direction of  
517 causation from OM thermodynamics to microbial properties in terms of community assembly  
518 (Fig. 1 arrow 4). As such, there may be a loop between OM thermodynamics and microbial  
519 processes (i.e., respiration) embedded in a larger loop that also includes microbial properties  
520 (i.e., community assembly). Such feedbacks are inherent in complex systems and often lead to  
521 non-linear dynamics as observed here in terms of the threshold-like impact of desiccation on  
522 multiple system components (87, 88).

523

524 As key elements of the inferred system of feedbacks, the links among OM thermodynamic  
525 properties, respiration, and desiccation found here are consistent with recent work tied to the  
526 same field system. That is, Garayburu-Caruso et al. (49) also showed decreasing aerobic  
527 respiration with decreasing favorability for oxidation (i.e., larger values of  $\Delta G^0_{\text{Cox}}$ ) using  
528 sediments sourced ~2 years previously from the same field system. In addition, the impacts of  
529 desiccation found here are similar to Goldman et al. (62) after re-inundation. This impact of  
530 desiccation on respiration contrasts with the Birch effect (89) in soils whereby desiccation  
531 followed by re-wetting leads to enhanced respiration. The consistency across hyporheic zone  
532 studies and deviation from classical soil phenomena points to potential consistency in governing  
533 processes within the hyporheic zone that deviate from processes operating in soil systems.  
534 Further evaluation is needed across additional hyporheic zone systems to rigorously evaluate  
535 this inference, however.

536

537 In addition to linkages between the environment and microbial aspects of the system, our study  
538 revealed connections within the environmental components of the conceptual framework. That  
539 is, greater cumulative desiccation caused an increase in  $\Delta G^0_{\text{Cox}}$ , indicating a significant change  
540 in OM thermodynamics (Fig. 7). While our data cannot pinpoint governing mechanism(s), we  
541 hypothesize that the  $\Delta G^0_{\text{Cox}}$  response may have been tied to increased ion concentration  
542 following desiccation. For example, OM chemistry may have been altered due to changes in  
543 abiotic sorption, limitations of microbially accessible C due to water potential constraints, and/or  
544 osmolyte production and formation of extracellular polymeric substances (90–92).

545

546 Irrespective of mechanisms, the shift in OM thermodynamics in response to desiccation was  
547 associated with a decline in respiration. We infer a causal connection between OM  
548 thermodynamics and respiration, potentially triggered by desiccation-driven shifts in OM  
549 chemistry and/or microbial physiology. This causal connection is supported by recent work (49)  
550 and the observation of a continuous function between  $\Delta G^0_{\text{Cox}}$  and respiration rate that  
551 transcended experimental treatments. Desiccation therefore likely influences and may even  
552 initiate an iterative loop among OM thermodynamics, microbial assembly, and biogeochemistry  
553 that underlies cumulative system function.

554

555 Cumulative system function can often be driven by ecosystem control points (52), but we  
556 observed relatively little indication of such behavior. That is, estimates of control point influence  
557 (CPI) were relatively low across most treatments. CPI is theoretically constrained to range from  
558 0.5-1, with lower values indicating smaller influences of control points. In our study, all but one  
559 treatment had CPI between ~0.5 and 0.7. The associated distributions of respiration rates did  
560 not contain obvious outliers such that we interpret CPI values in the 0.5-0.7 range to be  
561 relatively low and not strongly influenced by control points or biogeochemical hot  
562 spots/moments (51). The treatment with 31 cumulative days of desiccation diverged from the  
563 rest in having a CPI value of ~0.9. This large CPI was due to a single outlier (Fig. 5a) such that  
564 most of the cumulative respiration across reactors was contributed by that single reactor. We  
565 interpret that single reactor as a biogeochemical hot spot or control point within that



566 experimental treatment. It is unclear, however, what led to such behavior as disturbance did not  
567 have any systematic influence on CPI.

568  
569 A strength of CPI as a metric is that it allows for direct quantitative comparisons across studies,  
570 systems, and scales. Ours is the first study to estimate CPI, however, such that we cannot yet  
571 make comparisons to previous work. Through future comparisons it will be possible to evaluate  
572 the strengths, weaknesses, and behavior of CPI. We expect that some patterns may emerge  
573 such as CPI having a greater likelihood to reach very high values (near 1) in systems with  
574 relatively low rates on average. In these conditions, even a modest quantitative increase in  
575 biogeochemical rates can lead to a large proportional change such that most cumulative  
576 function is from a single point in space and/or time, resulting in large CPI. We also expect that  
577 some biogeochemical processes will show greater variation in CPI than others, potentially due  
578 to variation in degree of functional redundancy (93). For example, processes such as respiration  
579 can be performed by numerous microbial taxa (i.e., there is high functional redundancy), while  
580 others are more constrained to a relatively small number of taxa (e.g., ammonia oxidation). We  
581 hypothesize that CPI may be lower on average and less variable across systems and scales for  
582 biogeochemical processes with greater functional redundancy. Additional work will be needed to  
583 test this hypothesis.

584  
585 In this study we coupled intrinsic characteristics of natural hyporheic zone sediments with  
586 imposed constraints in the form of desiccation to evaluate an *a priori* conceptual framework  
587 modified from Hall et al. (6). Our results demonstrated strong and often non-linear connections  
588 among desiccation, OM thermodynamics, assembly of the putatively active microbial  
589 community, and respiration rates. Collating our results points to further modification of the  
590 framework into an *a posteriori* conceptual model containing nested feedback loops (**Fig. 6**). This  
591 conceptual model is consistent with the recently proposed unification of microbial ecology  
592 around the concepts of external forcing, internal dynamics, and historical contingencies (46).  
593 That is, we hypothesize that external forcing imposed by desiccation initiates multiple internal  
594 loops that drive biological and chemical dynamics that, in turn, underlie respiration responses to  
595 re-wetting that are contingent on desiccation history. The development of conceptual models  
596 such as this is key to incorporating additional mechanistic detail into predictive simulation  
597 models (e.g., reactive transport codes). We encourage further evaluation and improvement of  
598 both our *a priori* and *a posteriori* concepts across environmentally divergent conditions to  
599 generate knowledge that is transferable across systems.

600

## 601 **References**

602

- 603 1. R. L. Bier, E. S. Bernhardt, C. M. Boot, E. B. Graham, E. K. Hall, J. T. Lennon, D. R.  
604 Nemergut, B. B. Osborne, C. Ruiz-González, J. P. Schimel, M. P. Waldrop, M. D.  
605 Wallenstein, Linking microbial community structure and microbial processes: an empirical  
606 and conceptual overview. *FEMS Microbiol. Ecol.* **91** (2015), doi:10.1093/femsec/fiv113.
- 607 2. A. A. Malik, J. B. H. Martiny, E. L. Brodie, A. C. Martiny, K. K. Treseder, S. D. Allison,  
608 Defining trait-based microbial strategies with consequences for soil carbon cycling under  
609 climate change. *ISME J.* **14**, 1–9 (2020).

- 610 3. M. Manzella, R. Geiss, E. K. Hall, Evaluating the stoichiometric trait distributions of  
611 cultured bacterial populations and uncultured microbial communities. *Environ. Microbiol.*  
612 **21**, 3613–3626 (2019).
- 613 4. M. D. Wallenstein, E. K. Hall, A trait-based framework for predicting when and where  
614 microbial adaptation to climate change will affect ecosystem functioning. *Biogeochemistry.*  
615 **109**, 35–47 (2012).
- 616 5. W. R. Wieder, S. D. Allison, E. A. Davidson, K. Georgiou, O. Hararuk, Y. He, F. Hopkins,  
617 Y. Luo, M. J. Smith, B. Sulman, K. Todd-Brown, Y.-P. Wang, J. Xia, X. Xu, Explicitly  
618 representing soil microbial processes in Earth system models. *Glob. Biogeochem. Cycles.*  
619 **29**, 1782–1800 (2015).
- 620 6. E. K. Hall, E. S. Bernhardt, R. L. Bier, M. A. Bradford, C. M. Boot, J. B. Cotner, P. A. del  
621 Giorgio, S. E. Evans, E. B. Graham, S. E. Jones, J. T. Lennon, K. J. Locey, D. Nemergut,  
622 B. B. Osborne, J. D. Rocca, J. P. Schimel, M. P. Waldrop, M. D. Wallenstein,  
623 Understanding how microbiomes influence the systems they inhabit. *Nat. Microbiol.* **3**,  
624 977–982 (2018).
- 625 7. J. A. Gilbert, J. K. Jansson, R. Knight, Earth Microbiome Project and Global Systems  
626 Biology. *mSystems.* **3** (2018), doi:10.1128/mSystems.00217-17.
- 627 8. J. Lloyd-Price, C. Arze, A. N. Ananthakrishnan, M. Schirmer, J. Avila-Pacheco, T. W.  
628 Poon, E. Andrews, N. J. Ajami, K. S. Bonham, C. J. Brislawn, D. Casero, H. Courtney, A.  
629 Gonzalez, T. G. Graeber, A. B. Hall, K. Lake, C. J. Landers, H. Mallick, D. R. Plichta, M.  
630 Prasad, G. Rahnavard, J. Sauk, D. Shungin, Y. Vázquez-Baeza, R. A. White, J. Braun, L.  
631 A. Denson, J. K. Jansson, R. Knight, S. Kugathasan, D. P. B. McGovern, J. F. Petrosino,  
632 T. S. Stappenbeck, H. S. Winter, C. B. Clish, E. A. Franzosa, H. Vlamakis, R. J. Xavier, C.  
633 Huttenhower, Multi-omics of the gut microbial ecosystem in inflammatory bowel diseases.  
634 *Nature.* **569**, 655–662 (2019).
- 635 9. X. Fu, Y. Li, Y. Meng, Q. Yuan, Z. Zhang, D. Norbäck, Y. Deng, X. Zhang, Y. Sun, *bioRxiv*,  
636 in press, doi:10.1101/2020.01.05.893529.
- 637 10. S. König, A. Worrlich, T. Banitz, F. Centler, H. Harms, M. Kästner, A. Miltner, L. Y. Wick, M.  
638 Thullner, K. Frank, Spatiotemporal disturbance characteristics determine functional stability  
639 and collapse risk of simulated microbial ecosystems. *Sci. Rep.* **8**, 1–13 (2018).
- 640 11. S. Behrens, A. Kappler, M. Obst, Linking environmental processes to the in situ functioning  
641 of microorganisms by high-resolution secondary ion mass spectrometry (NanoSIMS) and  
642 scanning transmission X-ray microscopy (STXM). *Environ. Microbiol.* **14**, 2851–2869  
643 (2012).
- 644 12. S. Norland, K. M. Fagerbakke, M. Heldal, Light element analysis of individual bacteria by x-  
645 ray microanalysis. *Appl. Environ. Microbiol.* **61**, 1357–1362 (1995).
- 646 13. L. R. Thompson, J. G. Sanders, D. McDonald, A. Amir, J. Ladau, K. J. Locey, R. J. Prill, A.  
647 Tripathi, S. M. Gibbons, G. Ackermann, J. A. Navas-Molina, S. Janssen, E. Kopylova, Y.  
648 Vázquez-Baeza, A. González, J. T. Morton, S. Mirarab, Z. Zech Xu, L. Jiang, M. F.  
649 Haroon, J. Kanbar, Q. Zhu, S. Jin Song, T. Kosciolk, N. A. Bokulich, J. Leffler, C. J.  
650 Brislawn, G. Humphrey, S. M. Owens, J. Hampton-Marcell, D. Berg-Lyons, V. McKenzie,  
651 N. Fierer, J. A. Fuhrman, A. Clauset, R. L. Stevens, A. Shade, K. S. Pollard, K. D.  
652 Goodwin, J. K. Jansson, J. A. Gilbert, R. Knight, A communal catalogue reveals Earth's  
653 multiscale microbial diversity. *Nature.* **551**, 457–463 (2017).

- 654 14. M. Wagner, Single-cell ecophysiology of microbes as revealed by Raman  
655 microspectroscopy or secondary ion mass spectrometry imaging. *Annu. Rev. Microbiol.* **63**,  
656 411–429 (2009).
- 657 15. R. P. Bartelme, J. M. Custer, C. L. Dupont, J. L. Espinoza, M. Torralba, B. Khalili, P. Carini,  
658 Influence of Substrate Concentration on the Culturability of Heterotrophic Soil Microbes  
659 Isolated by High-Throughput Dilution-to-Extinction Cultivation. *mSphere.* **5** (2020),  
660 doi:10.1128/mSphere.00024-20.
- 661 16. R. L. Barnard, C. A. Osborne, M. K. Firestone, Changing precipitation pattern alters soil  
662 microbial community response to wet-up under a Mediterranean-type climate. *ISME J.* **9**,  
663 946–957 (2015).
- 664 17. S. J. Blazewicz, R. L. Barnard, R. A. Daly, M. K. Firestone, Evaluating rRNA as an  
665 indicator of microbial activity in environmental communities: limitations and uses. *ISME J.*  
666 **7**, 2061–2068 (2013).
- 667 18. D. C. Cardoso, A. Sandionigi, M. S. Cretoiu, M. Casiraghi, L. Stal, H. Bolhuis, Comparison  
668 of the active and resident community of a coastal microbial mat. *Sci. Rep.* **7**, 1–10 (2017).
- 669 19. P. J. Kearns, J. H. Angell, E. M. Howard, L. A. Deegan, R. H. R. Stanley, J. L. Bowen,  
670 Nutrient enrichment induces dormancy and decreases diversity of active bacteria in salt  
671 marsh sediments. *Nat. Commun.* **7**, 12881 (2016).
- 672 20. D. Shu, J. Guo, B. Zhang, Y. He, G. Wei, rDNA- and rRNA-derived communities present  
673 divergent assemblage patterns and functional traits throughout full-scale landfill leachate  
674 treatment process trains. *Sci. Total Environ.* **646**, 1069–1079 (2019).
- 675 21. N. I. Wisnoski, M. E. Muscarella, M. L. Larsen, A. L. Peralta, J. T. Lennon, Metabolic  
676 insight into bacterial community assembly across ecosystem boundaries. *Ecology.* **101**,  
677 e02968 (2020).
- 678 22. J. C. Stegen, X. Lin, A. E. Konopka, J. K. Fredrickson, Stochastic and deterministic  
679 assembly processes in subsurface microbial communities. *ISME J.* **6**, 1653–1664 (2012).
- 680 23. E. B. Graham, J. C. Stegen, Dispersal-Based Microbial Community Assembly Decreases  
681 Biogeochemical Function. *Processes.* **5**, 65 (2017).
- 682 24. F. Dini-Andreote, J. C. Stegen, J. D. van Elsas, J. F. Salles, Disentangling mechanisms  
683 that mediate the balance between stochastic and deterministic processes in microbial  
684 succession. *Proc. Natl. Acad. Sci.* **112**, E1326–E1332 (2015).
- 685 25. J. C. Stegen, X. Lin, J. K. Fredrickson, A. E. Konopka, Estimating and mapping ecological  
686 processes influencing microbial community assembly. *Front. Microbiol.* **6** (2015),  
687 doi:10.3389/fmicb.2015.00370.
- 688 26. J. C. Stegen, X. Lin, J. K. Fredrickson, X. Chen, D. W. Kennedy, C. J. Murray, M. L.  
689 Rockhold, A. Konopka, Quantifying community assembly processes and identifying  
690 features that impose them. *ISME J.* **7**, 2069–2079 (2013).
- 691 27. J. Zhou, D. Ning, Stochastic Community Assembly: Does It Matter in Microbial Ecology?  
692 *Microbiol. Mol. Biol. Rev.* **81** (2017), doi:10.1128/MMBR.00002-17.
- 693 28. J. Grilli, G. Barabás, M. J. Michalska-Smith, S. Allesina, Higher-order interactions stabilize  
694 dynamics in competitive network models. *Nature.* **548**, 210–213 (2017).
- 695 29. E. M. Bottos, D. W. Kennedy, E. B. Romero, S. J. Fansler, J. M. Brown, L. M. Bramer, R.  
696 K. Chu, M. M. Tfaily, J. K. Jansson, J. C. Stegen, Dispersal limitation and thermodynamic  
697 constraints govern spatial structure of permafrost microbial communities. *FEMS Microbiol.*

- 698 *Ecol.* **94** (2018), doi:10.1093/femsec/fiy110.
- 699 30. Y. Feng, R. Chen, J. C. Stegen, Z. Guo, J. Zhang, Z. Li, X. Lin, Two key features  
700 influencing community assembly processes at regional scale: Initial state and degree of  
701 change in environmental conditions. *Mol. Ecol.* **27**, 5238–5251 (2018).
- 702 31. S. D. Jurburg, I. Nunes, J. C. Stegen, X. Le Roux, A. Priemé, S. J. Sørensen, J. F. Salles,  
703 Autogenic succession and deterministic recovery following disturbance in soil bacterial  
704 communities. *Sci. Rep.* **7**, 1–11 (2017).
- 705 32. A. Sengupta, J. Indivero, C. Gunn, M. M. Tfaily, R. K. Chu, J. Toyoda, V. L. Bailey, N. D.  
706 Ward, J. C. Stegen, Spatial gradients in the characteristics of soil-carbon fractions are  
707 associated with abiotic features but not microbial communities. *Biogeosciences.* **16**, 3911–  
708 3928 (2019).
- 709 33. E. B. Graham, M. M. Tfaily, A. R. Crump, A. E. Goldman, L. M. Bramer, E. Arntzen, E.  
710 Romero, C. T. Resch, D. W. Kennedy, J. C. Stegen, Carbon Inputs From Riparian  
711 Vegetation Limit Oxidation of Physically Bound Organic Carbon Via Biochemical and  
712 Thermodynamic Processes. *J. Geophys. Res. Biogeosciences.* **122**, 3188–3205 (2017).
- 713 34. J. C. Stegen, T. Johnson, J. K. Fredrickson, M. J. Wilkins, A. E. Konopka, W. C. Nelson, E.  
714 V. Arntzen, W. B. Chrisler, R. K. Chu, S. J. Fansler, E. B. Graham, D. W. Kennedy, C. T.  
715 Resch, M. Tfaily, J. Zachara, Influences of organic carbon speciation on hyporheic corridor  
716 biogeochemistry and microbial ecology. *Nat. Commun.* **9**, 1–11 (2018).
- 717 35. J. C. Stegen, A. Konopka, J. P. McKinley, C. Murray, X. Lin, M. D. Miller, D. W. Kennedy,  
718 E. A. Miller, C. T. Resch, J. K. Fredrickson, Coupling among Microbial Communities,  
719 Biogeochemistry and Mineralogy across Biogeochemical Facies. *Sci. Rep.* **6**, 1–14 (2016).
- 720 36. P. Starnawski, T. Bataillon, T. J. G. Ettema, L. M. Jochum, L. Schreiber, X. Chen, M. A.  
721 Lever, M. F. Polz, B. B. Jørgensen, A. Schramm, K. U. Kjeldsen, Microbial community  
722 assembly and evolution in subseafloor sediment. *Proc. Natl. Acad. Sci.* **114**, 2940–2945  
723 (2017).
- 724 37. W. Wu, H.-P. Lu, A. Sastri, Y.-C. Yeh, G.-C. Gong, W.-C. Chou, C.-H. Hsieh, Contrasting  
725 the relative importance of species sorting and dispersal limitation in shaping marine  
726 bacterial versus protist communities. *ISME J.* **12**, 485–494 (2018).
- 727 38. W. Chen, K. Ren, A. Isabwe, H. Chen, M. Liu, J. Yang, Stochastic processes shape  
728 microeukaryotic community assembly in a subtropical river across wet and dry seasons.  
729 *Microbiome.* **7**, 138 (2019).
- 730 39. I. Martínez, J. C. Stegen, M. X. Maldonado-Gómez, A. M. Eren, P. M. Siba, A. R. Greenhill,  
731 J. Walter, The Gut Microbiota of Rural Papua New Guineans: Composition, Diversity  
732 Patterns, and Ecological Processes. *Cell Rep.* **11**, 527–538 (2015).
- 733 40. I. D. Ofiteiru, M. Lunn, T. P. Curtis, G. F. Wells, C. S. Criddle, C. A. Francis, W. T. Sloan,  
734 Combined niche and neutral effects in a microbial wastewater treatment community. *Proc.*  
735 *Natl. Acad. Sci.* **107**, 15345–15350 (2010).
- 736 41. J. Zhou, W. Liu, Y. Deng, Y.-H. Jiang, K. Xue, Z. He, J. D. V. Nostrand, L. Wu, Y. Yang, A.  
737 Wang, Stochastic Assembly Leads to Alternative Communities with Distinct Functions in a  
738 Bioreactor Microbial Community. *mBio.* **4** (2013), doi:10.1128/mBio.00584-12.
- 739 42. X. Jia, F. Dini-Andreote, J. Falcão Salles, Comparing the Influence of Assembly Processes  
740 Governing Bacterial Community Succession Based on DNA and RNA Data.  
741 *Microorganisms.* **8**, 798 (2020).



- 742 43. R. A. Daly, M. A. Borton, M. J. Wilkins, D. W. Hoyt, D. J. Kountz, R. A. Wolfe, S. A. Welch,  
743 D. N. Marcus, R. V. Trexler, J. D. MacRae, J. A. Krzycki, D. R. Cole, P. J. Mouser, K. C.  
744 Wrighton, Microbial metabolisms in a 2.5-km-deep ecosystem created by hydraulic  
745 fracturing in shales. *Nat. Microbiol.* **1**, 1–9 (2016).
- 746 44. G. E. Leventhal, M. Ackermann, K. T. Schiessl, Why microbes secrete molecules to modify  
747 their environment: the case of iron-chelating siderophores. *J. R. Soc. Interface.* **16**,  
748 20180674 (2019).
- 749 45. C. Ratzke, J. Denk, J. Gore, Ecological suicide in microbes. *Nat. Ecol. Evol.* **2**, 867–872  
750 (2018).
- 751 46. J. C. Stegen, E. M. Bottos, J. K. Jansson, A unified conceptual framework for prediction  
752 and control of microbiomes. *Curr. Opin. Microbiol.* (2018), doi:10.1016/j.mib.2018.06.002.
- 753 47. E. B. Graham, A. R. Crump, D. W. Kennedy, E. Arntzen, S. Fansler, S. O. Purvine, C. D.  
754 Nicora, W. Nelson, M. M. Tfaily, J. C. Stegen, Multi 'omics comparison reveals  
755 metabolome biochemistry, not microbiome composition or gene expression, corresponds  
756 to elevated biogeochemical function in the hyporheic zone. *Sci. Total Environ.* **642**, 742–  
757 753 (2018).
- 758 48. K. Boye, V. Noël, M. M. Tfaily, S. E. Bone, K. H. Williams, J. R. Bargar, S. Fendorf,  
759 Thermodynamically controlled preservation of organic carbon in floodplains. *Nat. Geosci.*  
760 **10**, 415–419 (2017).
- 761 49. V. A. Garayburu-Caruso, J. C. Stegen, H.-S. Song, L. Renteria, J. Wells, W. Garcia, C. T.  
762 Resch, A. E. Goldman, R. K. Chu, J. Toyoda, E. B. Graham, Carbon Limitation Leads to  
763 Thermodynamic Regulation of Aerobic Metabolism. *Environ. Sci. Technol. Lett.* (2020),  
764 doi:10.1021/acs.estlett.0c00258.
- 765 50. H.-S. Song, J. C. Stegen, E. B. Graham, J.-Y. Lee, V. A. Garayburu-Caruso, W. C. Nelson,  
766 X. Chen, J. D. Moulton, T. D. Scheibe, *bioRxiv*, in press, doi:10.1101/2020.02.27.968669.
- 767 51. M. E. McClain, E. W. Boyer, C. L. Dent, S. E. Gergel, N. B. Grimm, P. M. Groffman, S. C.  
768 Hart, J. W. Harvey, C. A. Johnston, E. Mayorga, W. H. McDowell, G. Pinay,  
769 Biogeochemical Hot Spots and Hot Moments at the Interface of Terrestrial and Aquatic  
770 Ecosystems. *Ecosystems.* **6**, 301–312 (2003).
- 771 52. E. S. Bernhardt, J. R. Blaszczak, C. D. Ficken, M. L. Fork, K. E. Kaiser, E. C. Seybold,  
772 Control Points in Ecosystems: Moving Beyond the Hot Spot Hot Moment Concept.  
773 *Ecosystems.* **20**, 665–682 (2017).
- 774 53. B. Arora, M. A. Briggs, J. Zarnetske, J. C. Stegen, J. Gomez-Velez, D. Dwivedi, C. I.  
775 Steefel, in *Biogeochemistry of the Critical Zone*, A. Wymore, W. Yang, W. Silver, B.  
776 McDowell, J. Chorover, Eds. (Springer-Nature, 2020).
- 777 54. F. Boano, J. W. Harvey, A. Marion, A. I. Packman, R. Revelli, L. Ridolfi, A. Wörman,  
778 Hyporheic flow and transport processes: Mechanisms, models, and biogeochemical  
779 implications. *Rev. Geophys.* **52**, 603–679 (2014).
- 780 55. R. M. Burrows, H. Rutledge, N. R. Bond, S. M. Eberhard, A. Auhl, M. S. Andersen, D. G.  
781 Valdez, M. J. Kennard, High rates of organic carbon processing in the hyporheic zone of  
782 intermittent streams. *Sci. Rep.* **7**, 1–11 (2017).
- 783 56. B. O. L. Demars, Hydrological pulses and burning of dissolved organic carbon by stream  
784 respiration. *Limnol. Oceanogr.* **64**, 406–421 (2019).
- 785 57. H. Fischer, F. Kloep, S. Wilzcek, M. T. Pusch, A River's Liver – Microbial Processes within



- 786 the Hyporheic Zone of a Large Lowland River. *Biogeochemistry*. **76**, 349–371 (2005).
- 787 58. M. H. Kaufman, M. B. Cardenas, J. Buttles, A. J. Kessler, P. L. M. Cook, Hyporheic hot  
788 moments: Dissolved oxygen dynamics in the hyporheic zone in response to surface flow  
789 perturbations. *Water Resour. Res.* **53**, 6642–6662 (2017).
- 790 59. S. T. Larned, T. Datry, D. B. Arscott, K. Tockner, Emerging concepts in temporary-river  
791 ecology. *Freshw. Biol.* **55**, 717–738 (2010).
- 792 60. A. M. Romani, E. Vázquez, A. Butturini, Microbial Availability and Size Fractionation of  
793 Dissolved Organic Carbon After Drought in an Intermittent Stream: Biogeochemical Link  
794 Across the Stream–Riparian Interface. *Microb. Ecol.* **52**, 501–512 (2006).
- 795 61. H. F. Birch, Mineralisation of plant nitrogen following alternate wet and dry conditions.  
796 *Plant Soil*. **20**, 43–49 (1964).
- 797 62. A. E. Goldman, E. B. Graham, A. R. Crump, D. W. Kennedy, E. B. Romero, C. G.  
798 Anderson, K. L. Dana, C. T. Resch, J. K. Fredrickson, J. C. Stegen, Biogeochemical  
799 cycling at the aquatic–terrestrial interface is linked to parafluvial hyporheic zone inundation  
800 history. *Biogeosciences*. **14**, 4229–4241 (2017).
- 801 63. E. B. Graham, A. R. Crump, C. T. Resch, S. Fansler, E. Arntzen, D. W. Kennedy, J. K.  
802 Fredrickson, J. C. Stegen, Coupling Spatiotemporal Community Assembly Processes to  
803 Changes in Microbial Metabolism. *Front. Microbiol.* **7** (2016),  
804 doi:10.3389/fmicb.2016.01949.
- 805 64. J. M. Zachara, P. E. Long, J. Bargar, J. A. Davis, P. Fox, J. K. Fredrickson, M. D. Freshley,  
806 A. E. Konopka, C. Liu, J. P. McKinley, M. L. Rockhold, K. H. Williams, S. B. Yabusaki,  
807 Persistence of uranium groundwater plumes: Contrasting mechanisms at two DOE sites in  
808 the groundwater–river interaction zone. *J. Contam. Hydrol.* **147**, 45–72 (2013).
- 809 65. L. D. Slater, D. Ntarlagiannis, F. D. Day-Lewis, K. Mwakanyamale, R. J. Versteeg, A.  
810 Ward, C. Strickland, C. D. Johnson, J. W. Lane, Use of electrical imaging and distributed  
811 temperature sensing methods to characterize surface water–groundwater exchange  
812 regulating uranium transport at the Hanford 300 Area, Washington. *Water Resour. Res.* **46**  
813 (2010), doi:10.1029/2010WR009110.
- 814 66. E. Arntzen, Effects of fluctuating river flow on groundwater/surface water mixing in the  
815 hyporheic zone of a regulated, large cobble bed river - Arntzen - 2006 - River Research  
816 and Applications - Wiley Online Library (2006), (available at  
817 <https://onlinelibrary.wiley.com/doi/abs/10.1002/rra.947>).
- 818 67. S. Fatichi, S. Manzoni, D. Or, A. Paschalis, A Mechanistic Model of Microbially Mediated  
819 Soil Biogeochemical Processes: A Reality Check. *Glob. Biogeochem. Cycles*. **33**, 620–648  
820 (2019).
- 821 68. E. B. Graham, A. R. Crump, C. T. Resch, S. Fansler, E. Arntzen, D. W. Kennedy, J. K.  
822 Fredrickson, J. C. Stegen, Deterministic influences exceed dispersal effects on  
823 hydrologically-connected microbiomes. *Environ. Microbiol.* **19**, 1552–1567 (2017).
- 824 69. J. Brown, N. Zavoshy, C. J. Brislawn, L. A. McCue, “Hundo: a Snakemake workflow for  
825 microbial community sequence data” (e27272v1, PeerJ Inc., 2018), ,  
826 doi:10.7287/peerj.preprints.27272v1.
- 827 70. R. E. Danczak, A. E. Goldman, R. K. Chu, J. G. Toyoda, V. A. Garayburu-Caruso, N. Tolić,  
828 E. B. Graham, J. W. Morad, L. Renteria, J. R. Wells, S. P. Herzog, A. S. Ward, J. C.  
829 Stegen, *bioRxiv*, in press, doi:10.1101/2020.02.12.946459.

- 830 71. D. E. LaRowe, P. Van Cappellen, Degradation of natural organic matter: A thermodynamic  
831 analysis. *Geochim. Cosmochim. Acta.* **75**, 2030–2042 (2011).
- 832 72. B. M. Tripathi, J. C. Stegen, M. Kim, K. Dong, J. M. Adams, Y. K. Lee, Soil pH mediates  
833 the balance between stochastic and deterministic assembly of bacteria. *ISME J.* **12**, 1072–  
834 1083 (2018).
- 835 73. J. Wang, J. Shen, Y. Wu, C. Tu, J. Soininen, J. C. Stegen, J. He, X. Liu, L. Zhang, E.  
836 Zhang, Phylogenetic beta diversity in bacterial assemblages across ecosystems:  
837 deterministic versus stochastic processes. *ISME J.* **7**, 1310–1321 (2013).
- 838 74. L. Fillinger, Y. Zhou, C. Kellermann, C. Griebler, Non-random processes determine the  
839 colonization of groundwater sediments by microbial communities in a pristine porous  
840 aquifer. *Environ. Microbiol.* **21**, 327–342 (2019).
- 841 75. Y. Li, Y. Gao, W. Zhang, C. Wang, P. Wang, L. Niu, H. Wu, Homogeneous selection  
842 dominates the microbial community assembly in the sediment of the Three Gorges  
843 Reservoir. *Sci. Total Environ.* **690**, 50–60 (2019).
- 844 76. A. Sengupta, J. C. Stegen, A. A. M. Neto, Y. Wang, J. W. Neilson, T. Tatarin, E. Hunt, K.  
845 Dontsova, J. Chorover, P. A. Troch, R. M. Maier, Assessing Microbial Community Patterns  
846 During Incipient Soil Formation From Basalt. *J. Geophys. Res. Biogeosciences.* **124**, 941–  
847 958 (2019).
- 848 77. T. Whitman, R. Neurath, A. Perera, I. Chu-Jacoby, D. Ning, J. Zhou, P. Nico, J. Pett-Ridge,  
849 M. Firestone, Microbial community assembly differs across minerals in a rhizosphere  
850 microcosm. *Environ. Microbiol.* **20**, 4444–4460 (2018).
- 851 78. E. S. Boyd, D. E. Cummings, G. G. Geesey, Mineralogy Influences Structure and Diversity  
852 of Bacterial Communities Associated with Geological Substrata in a Pristine Aquifer.  
853 *Microb. Ecol.* **54**, 170–182 (2007).
- 854 79. J. K. Carson, L. Campbell, D. Rooney, N. Clipson, D. B. Gleeson, Minerals in soil select  
855 distinct bacterial communities in their microhabitats. *FEMS Microbiol. Ecol.* **67**, 381–388  
856 (2009).
- 857 80. S. Doetterl, A. A. Berhe, C. Arnold, S. Bodé, P. Fiener, P. Finke, L. Fuchslueger, M.  
858 Griepentrog, J. W. Harden, E. Nadeu, J. Schneckner, J. Six, S. Trumbore, K. Van Oost, C.  
859 Vogel, P. Boeckx, Links among warming, carbon and microbial dynamics mediated by soil  
860 mineral weathering. *Nat. Geosci.* **11**, 589–593 (2018).
- 861 81. B. Fauvel, H.-M. Cauchie, C. Gantzer, L. Ogorzaly, Influence of physico-chemical  
862 characteristics of sediment on the in situ spatial distribution of F-specific RNA phages in  
863 the riverbed. *FEMS Microbiol. Ecol.* **95** (2019), doi:10.1093/femsec/fiy240.
- 864 82. B. S. Mauck, J. A. Roberts, Mineralogic Control on Abundance and Diversity of Surface-  
865 Adherent Microbial Communities. *Geomicrobiol. J.* **24**, 167–177 (2007).
- 866 83. Z. B. Freedman, K. J. Romanowicz, R. A. Upchurch, D. R. Zak, Differential responses of  
867 total and active soil microbial communities to long-term experimental N deposition. *Soil*  
868 *Biol. Biochem.* **90**, 275–282 (2015).
- 869 84. D. J. Levy-Booth, I. J. W. Giesbrecht, C. T. E. Kellogg, T. J. Heger, D. V. D'Amore, P. J.  
870 Keeling, S. J. Hallam, W. W. Mohn, Seasonal and ecohydrological regulation of active  
871 microbial populations involved in DOC, CO<sub>2</sub>, and CH<sub>4</sub> fluxes in temperate rainforest soil.  
872 *ISME J.* **13**, 950–963 (2019).
- 873 85. D. S. Baldwin, A. M. Mitchell, The effects of drying and re-flooding on the sediment and soil

- 874 nutrient dynamics of lowland river–floodplain systems: a synthesis. *Regul. Rivers Res.*  
875 *Manag.* **16**, 457–467 (2000).
- 876 86. S. Manzoni, J. P. Schimel, A. Porporato, Responses of soil microbial communities to water  
877 stress: results from a meta-analysis. *Ecology*. **93**, 930–938 (2012).
- 878 87. S. Pérez Castro, E. E. Cleland, R. Wagner, R. A. Sawad, D. A. Lipson, Soil microbial  
879 responses to drought and exotic plants shift carbon metabolism. *ISME J.* **13**, 1776–1787  
880 (2019).
- 881 88. J. I. Prosser, J. B. H. Martiny, Conceptual challenges in microbial community ecology.  
882 *Philos. Trans. R. Soc. B Biol. Sci.* **375**, 20190241 (2020).
- 883 89. H. F. Birch, M. T. Friend, Humus Decomposition in East African Soils. *Nature*. **178**, 500–  
884 501 (1956).
- 885 90. N. Fierer, A. S. Allen, J. P. Schimel, P. A. Holden, Controls on microbial CO<sub>2</sub> production: a  
886 comparison of surface and subsurface soil horizons. *Glob. Change Biol.* **9**, 1322–1332  
887 (2003).
- 888 91. G. Gionchetta, F. Oliva, A. M. Romani, L. Baneras, Hydrological variations shape diversity  
889 and functional responses of streambed microbes. *Sci. Total Environ.* **714**, 136838 (2020).
- 890 92. P. M. Homyak, J. C. Blankinship, E. W. Slessarev, S. M. Schaeffer, S. Manzoni, J. P.  
891 Schimel, Effects of altered dry season length and plant inputs on soluble soil carbon.  
892 *Ecology*. **99**, 2348–2362 (2018).
- 893 93. S. Louca, M. F. Polz, F. Mazel, M. B. N. Albright, J. A. Huber, M. I. O’Connor, M.  
894 Ackermann, A. S. Hahn, D. S. Srivastava, S. A. Crowe, M. Doebeli, L. W. Parfrey, Function  
895 and functional redundancy in microbial systems. *Nat. Ecol. Evol.* **2**, 936–943 (2018).
- 896 94. J. G. Caporaso, EMP 16S Illumina Amplicon Protocol (2018),  
897 doi:10.17504/protocols.io.nuudeww.

898

## 899 **Acknowledgements**

900 We thank Amy Goldman and Nathan Johnson for developing graphics. **Funding:** The initial  
901 experimental stages of this work were supported by the PREMIS Initiative at the Pacific  
902 Northwest National Laboratory (PNNL) with funding from the Laboratory Directed Research and  
903 Development Program at PNNL, a multi-program national laboratory operated by Battelle for the  
904 US Department of Energy under Contract DE-AC05-76RL01830. The later stages of this work  
905 (e.g., data analysis, conceptual interpretation, manuscript development) were supported by the  
906 U.S. Department of Energy-BER program, as part of an Early Career Award to JCS at PNNL. A  
907 portion of the research was performed using EMSL, a DOE Office of Science User Facility  
908 sponsored by the Office of Biological and Environmental Research. **Author contributions:** JCS  
909 and SF conceptualized and designed the study; JT, JW, LR, RC, SF, and VAG-C performed the  
910 experiment; AS, JCS, RED, and SF analyzed data; AS, JCS, and SF drafted the manuscript and  
911 all authors contributed to further writing. **Competing Interests:** The authors declare no  
912 competing interests. **Data and materials availability:** Data are available on the ESS-DIVE  
913 archive at the following link (a data package will be published prior to the manuscript being  
914 published, and the associated link will be provided). Sequence data is available on NCBI’s  
915 Sequence Read Archive PRJNA641165.

916 **Figures**  
917

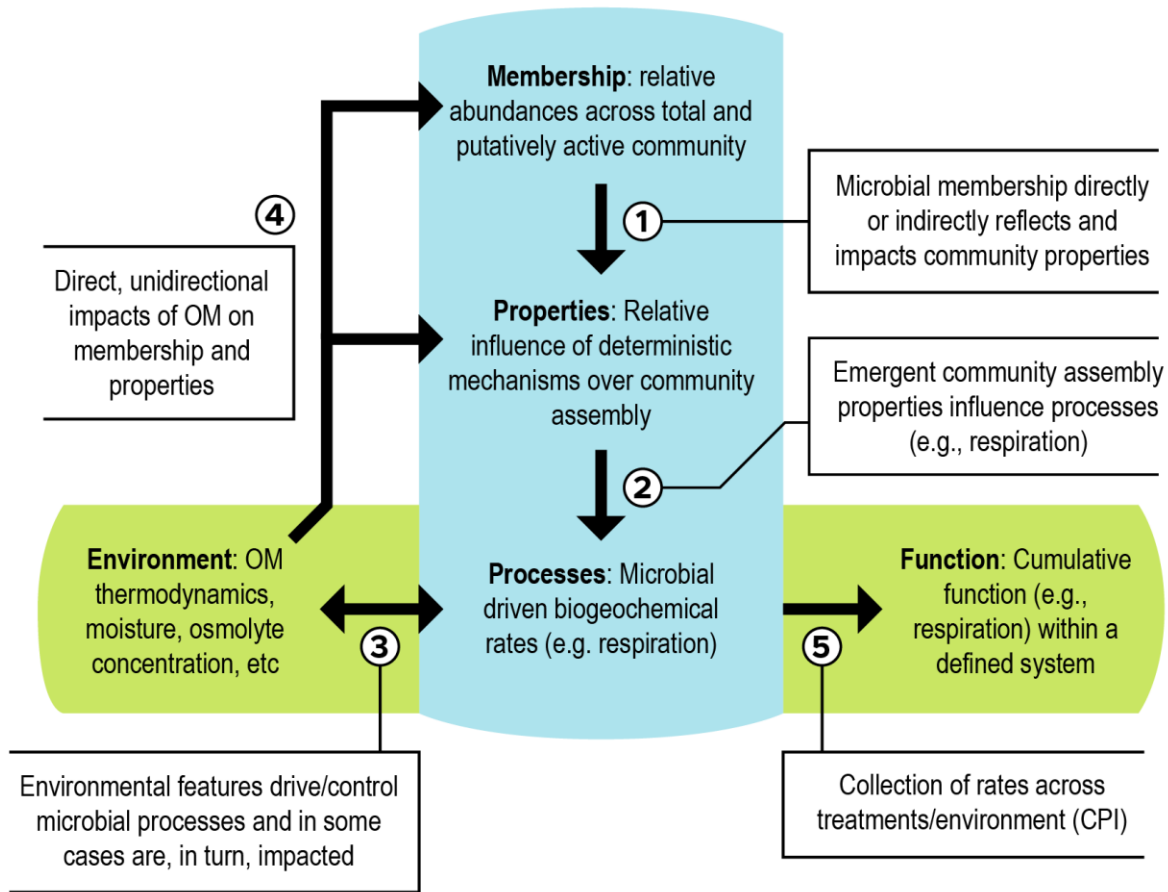

918  
919

920 **Figure 1. Integrated conceptual framework.** The conceptual figure (modified from Hall et al.  
921 (6)) details relationships (indicated by numbered arrows) between cumulative properties of the  
922 microbial community (e.g., microbial membership, community assembly properties,  
923 biogeochemical rates), environmental features (e.g., organic matter thermodynamics), and  
924 emergent ecosystem function

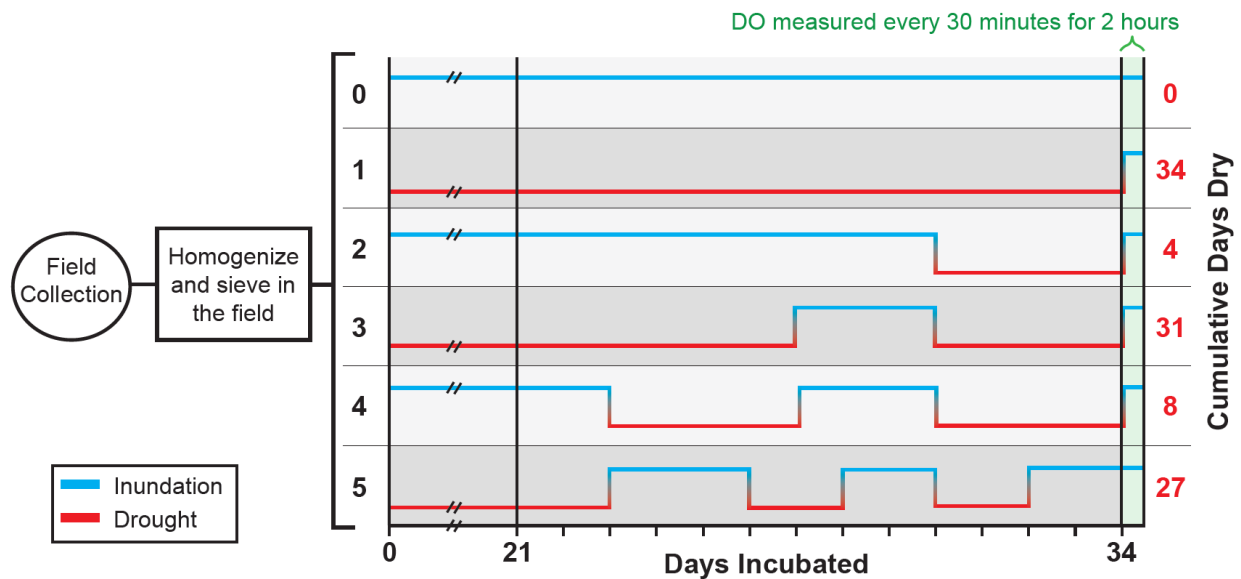

925  
926  
927

928 **Figure 2. Experimental design of batch reactor incubations subjected to six treatment**  
929 **regimes of inundated (blue line) and dry (red line) conditions.** Black values on the left  
930 indicate the number of inundated/dry transitions, including the final inundation that all treatments  
931 experienced immediately prior to the measurement of respiration. Red values on the right  
932 indicate the number of cumulative dry days (e.g., treatments with 1 or 3 transitions experienced  
933 34 or 31 cumulative dry days, respectively). Transitions between inundated and dry conditions  
934 started on day 24. All treatments were held at either an inundated or dry state prior to day 24.



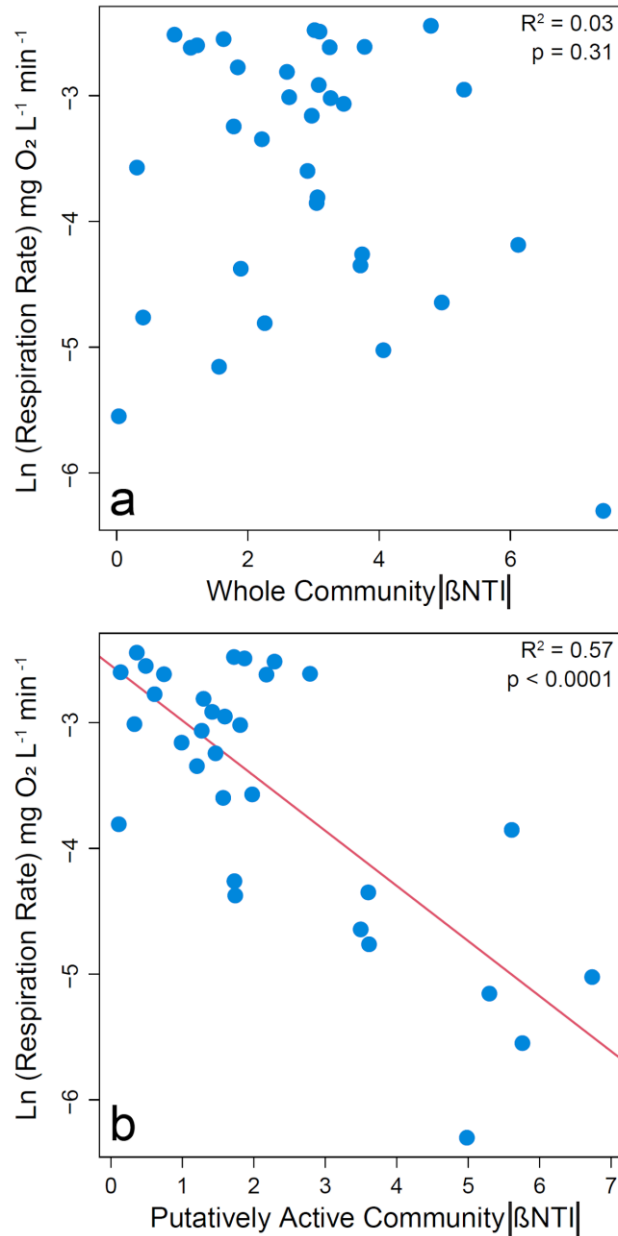

935

936

937 **Figure 3. Natural log transformed respiration rates (i.e., O<sub>2</sub> consumption) as a function of**

938 **the absolute value of  $\beta\text{NTI}$  for (a) whole communities or (b) putatively active**

939 **communities.** Larger absolute values of  $\beta\text{NTI}$  indicate stronger influences of deterministic

940 assembly. Nonlinearity was observed because the respiration rate has a lower limit of 0 such

941 that its relationship with  $\beta\text{NTI}$  was fit as a negative exponential function. The significant

942 regression model is shown as a red line, and statistics are provided on each panel.

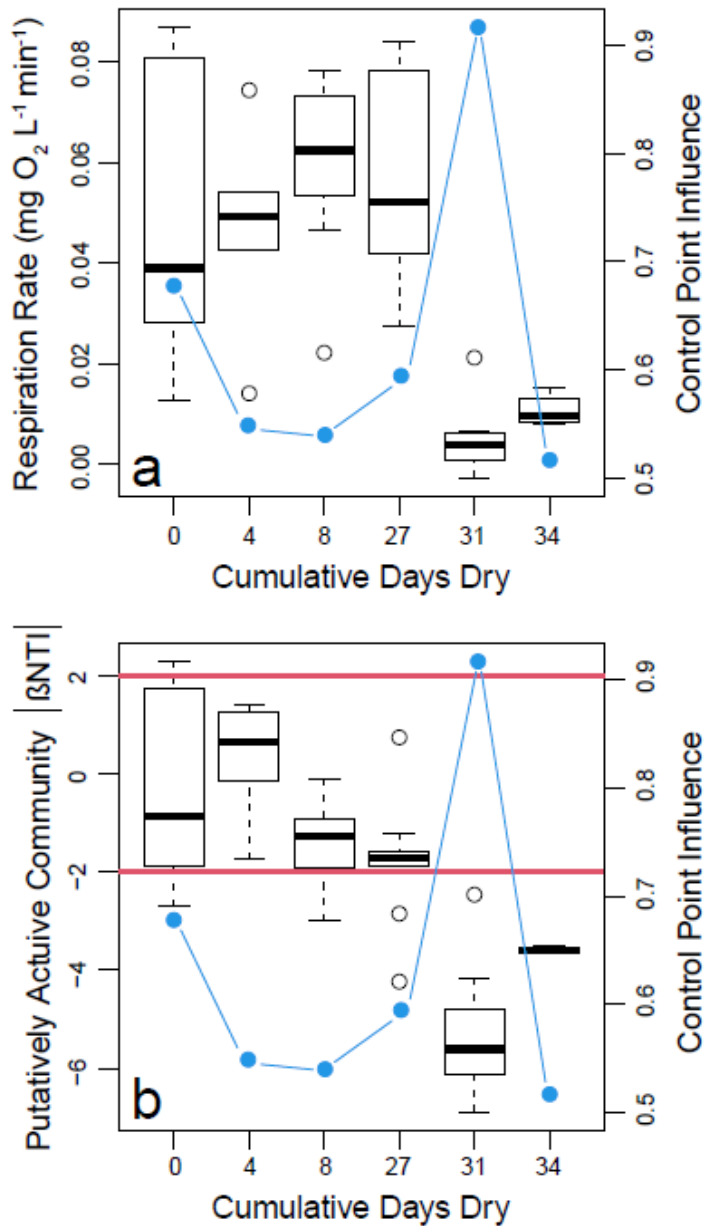

943  
944 **Figure 4. Boxplot representations of respiration rate (a) and putatively active community**  
945 **βNTI (b) distributions as a function of the cumulative number of days reactors were in a**  
946 **dried state.** Each value along the horizontal axis represents a different experimental treatment.  
947 On both panels the right hand axis provides estimates of control point influence (blue circles and  
948 lines) across the treatments. Horizontal red lines in (b) indicate significance thresholds; values  
949 below -2 indicate deterministic homogenous selection, values above +2 indicate deterministic  
950 variable selection, and values between -2 and +2 indicate stochastic assembly.

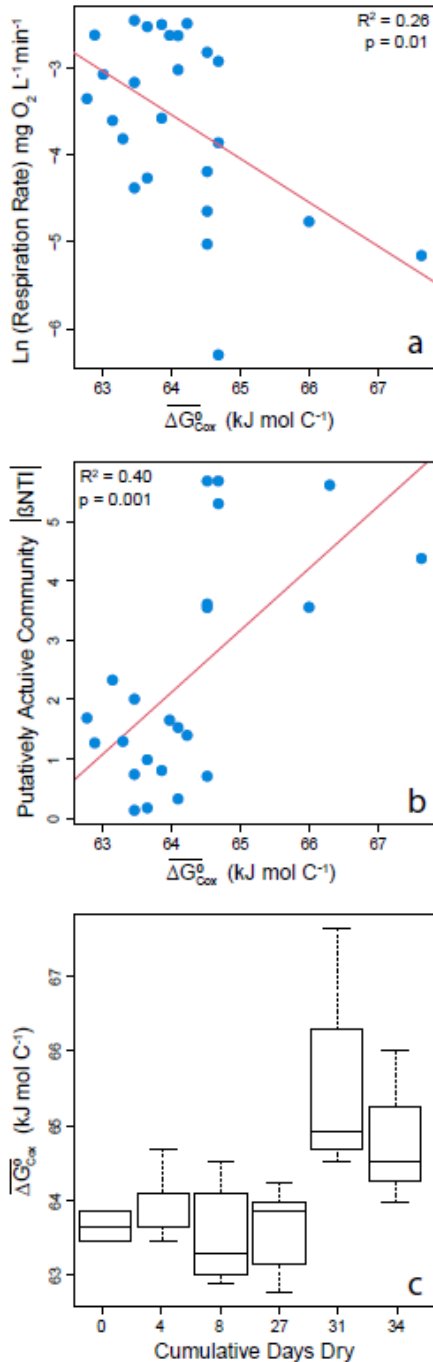

951  
952 **Figure 5. Microbial processes and properties as a function of OM thermodynamics, and**  
953 **impacts of disturbance on OM thermodynamics.** (a) Respiration rates (natural log  
954 transformed) decreased with decreasing favorability for oxidation (larger values of  $\Delta G^0_{Cox}$ ). (b)  
955 The strength of deterministic selection measured as the absolute value of  $\beta NTI$  increased with  
956 decreasing favorability for oxidation. Regression models are shown as red lines and statistics  
957 are provided on each panel. (c) Boxplot representations of the distributions of OM  
958 thermodynamics across experimental treatments. Significant increases were observed for  
959 treatments with 31 or 34 cumulative dry days. See text and Figure S7 for a description of  
960 statistics.

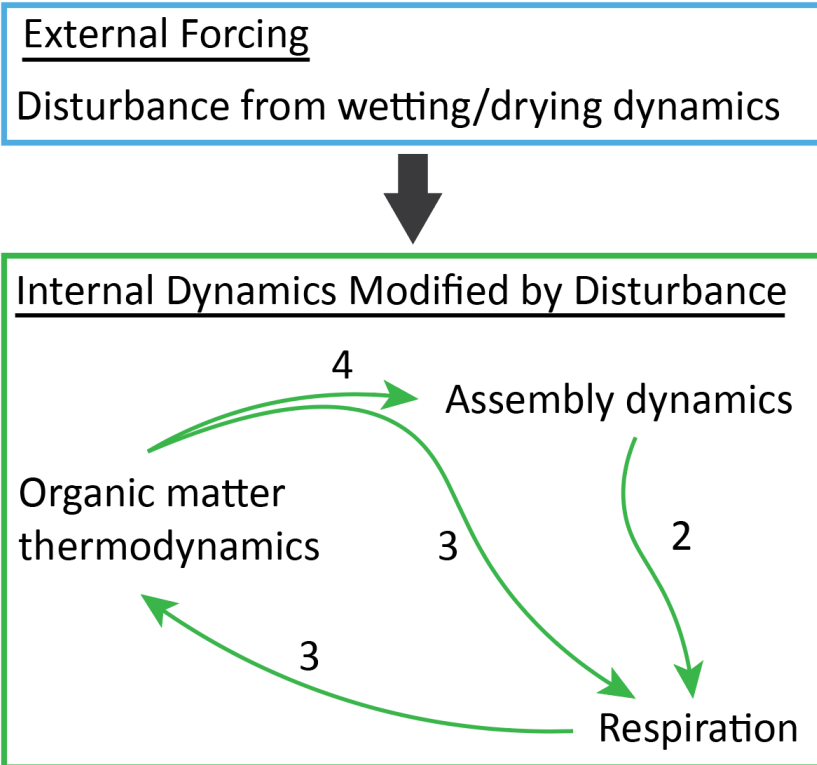

961  
962

963 **Figure 6. Integrated conceptual interpretation of results from this study.** Collectively, our  
964 results indicate that the external forcing imposed by disturbance leads to feedback between  
965 assembly of the putatively active community and respiration rates that is modulated by coupled  
966 dynamics in organic matter thermodynamics. Relative to Fig. 1, here external and internal  
967 aspects of the environment are separated. The arrows within the internal dynamics component  
968 are analogous to arrows 2,3, and 4 in Figure 1. The arrow from external to internal is not  
969 considered in Figure 1, and represents the impact of external forcing on all aspects of the  
970 internal system. These impacts are both direct effects of disturbance and indirect effects  
971 mediated through the internal feedback that collectively lead to impacts of re-wetting that are  
972 contingent on desiccation history.

973 **Supplementary Materials**

974

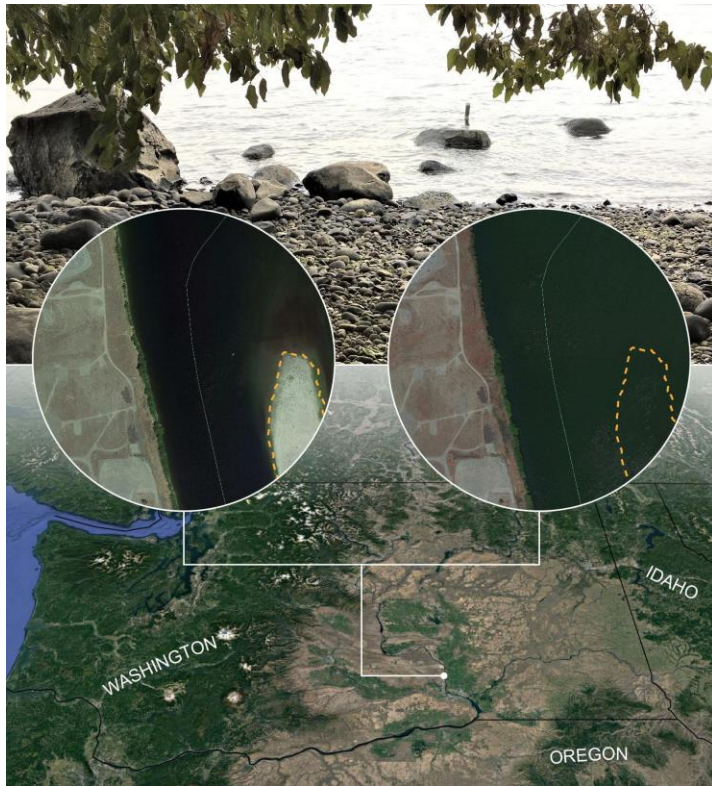

975

976

977 **Supplementary Figure S1. Field location from which sediments were collected.** The site is  
978 along the Columbia River in southeast Washington State, as shown in the bottom portion of the  
979 image. The system is characterized by variable inundation of the river bed sediments and  
980 associated hyporheic zone. The middle images emphasize this variability in inundation. In those  
981 images the dashed yellow line is in the same location and outlines the shoreline of an island that  
982 is exposed during low water and inundated during high water. The photo at the top of the image  
983 is from the location of sediment collection. As can be seen, the system contains large cobbles  
984 and gravels, which are partially responsible for high hydrologic conductivity within the hyporheic  
985 zone, resulting in aerobic conditions during both inundated and non-inundated conditions.



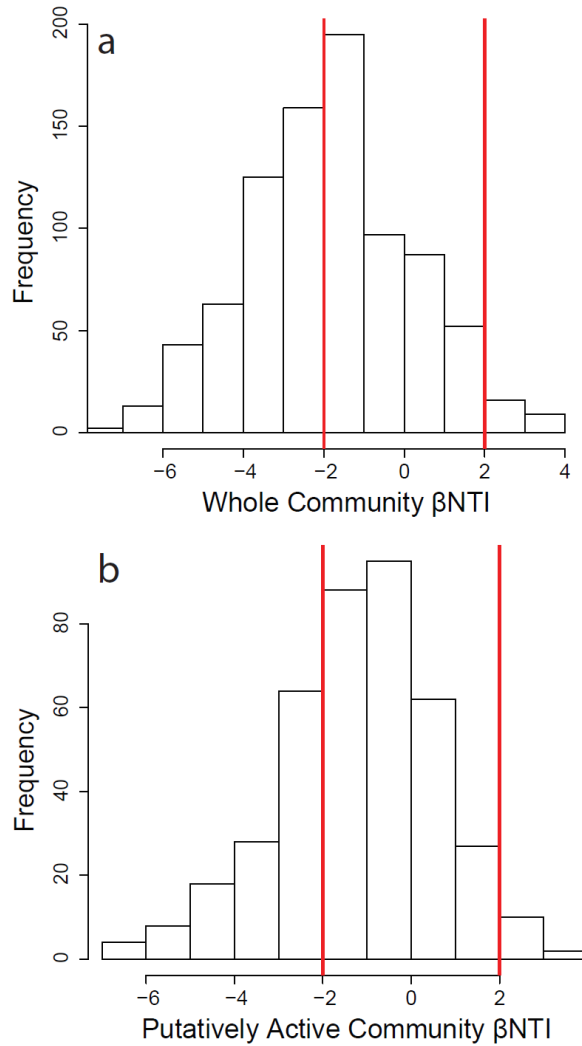

986  
987  
988  
989  
990  
991

**Supplementary Figure S2. Histograms of  $\beta$ NTI associated with whole communities (a) and putatively active communities (b).** Vertical red lines are the significant thresholds (-2 and +2). Values below -2 indicate deterministic homogenous selection, values above +2 indicate deterministic variable selection, and values between -2 and +2 indicate stochastic assembly.

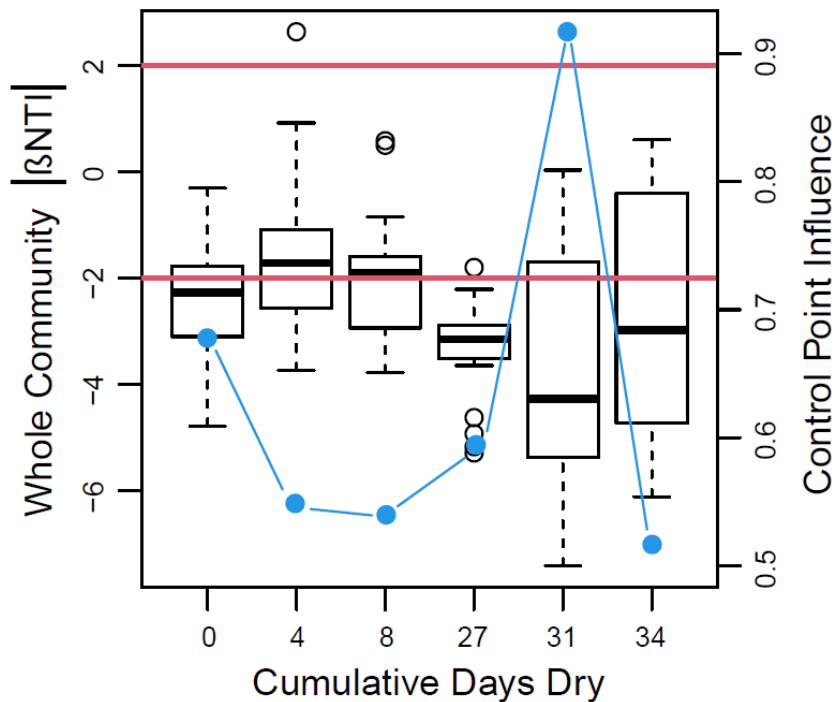

992  
993 **Supplementary Figure S3. Boxplot representations of whole community  $\beta$ NTI**  
994 **distributions as a function of the cumulative number of days reactors were in a dried**  
995 **state.** Each value along the horizontal axis represents a different experimental treatment. The  
996 right hand axis provides estimates of control point influence (blue circles and lines) across the  
997 treatments. Horizontal red lines indicate significance thresholds for  $\beta$ NTI; values below -2  
998 indicate deterministic homogenous selection, values above +2 indicate deterministic variable  
999 selection, and values between -2 and +2 indicate stochastic assembly.

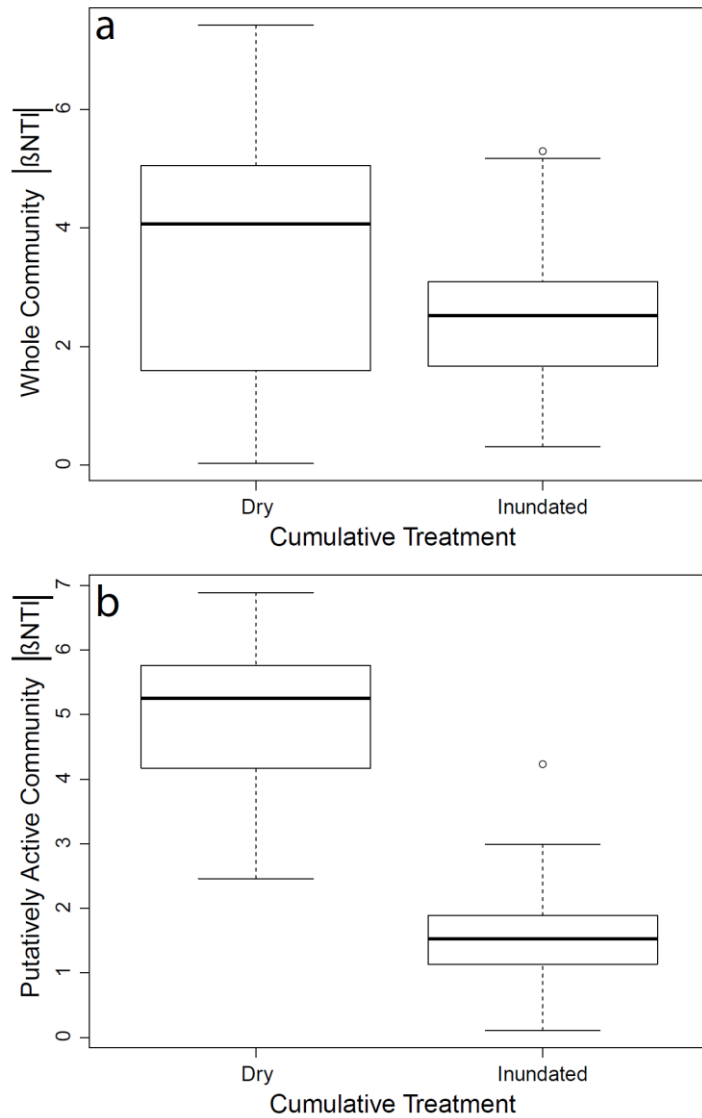

1000  
1001

1002 **Supplementary Figure S4. Boxplot representations of distributions of the absolute values**  
1003 **of  $\beta$ NTI for the whole community (a) and the putatively active community (b) across two**  
1004 **different categories of disturbance.** On the horizontal axis 'Dry' indicates data combined  
1005 across treatments with 31 or 34 cumulative dry days, while 'Inundated' indicates data combined  
1006 from across treatments with 0-27 cumulative dry days.

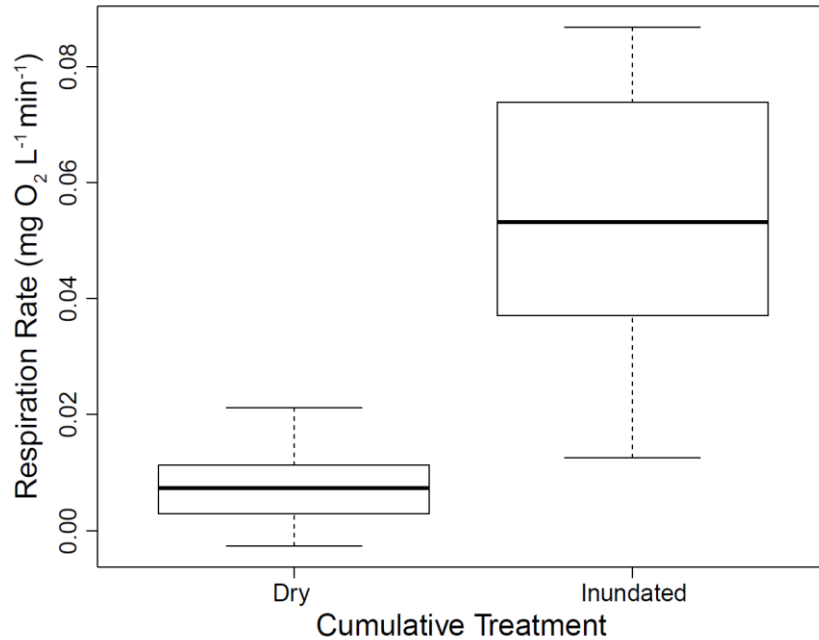

1007  
1008  
1009  
1010  
1011  
1012  
1013

**Supplementary Figure S5. Boxplot representations of respiration rate distributions across two different categories of disturbance.** On the horizontal axis 'Dry' indicates data combined from across treatments with 31 or 34 cumulative dry days, while 'Inundated' indicates data combined from across treatments with 0-27 cumulative dry days. The two distributions were significantly different per a pairwise Mann-Whitney test ( $W = 5$ ,  $p < 0.001$ ).

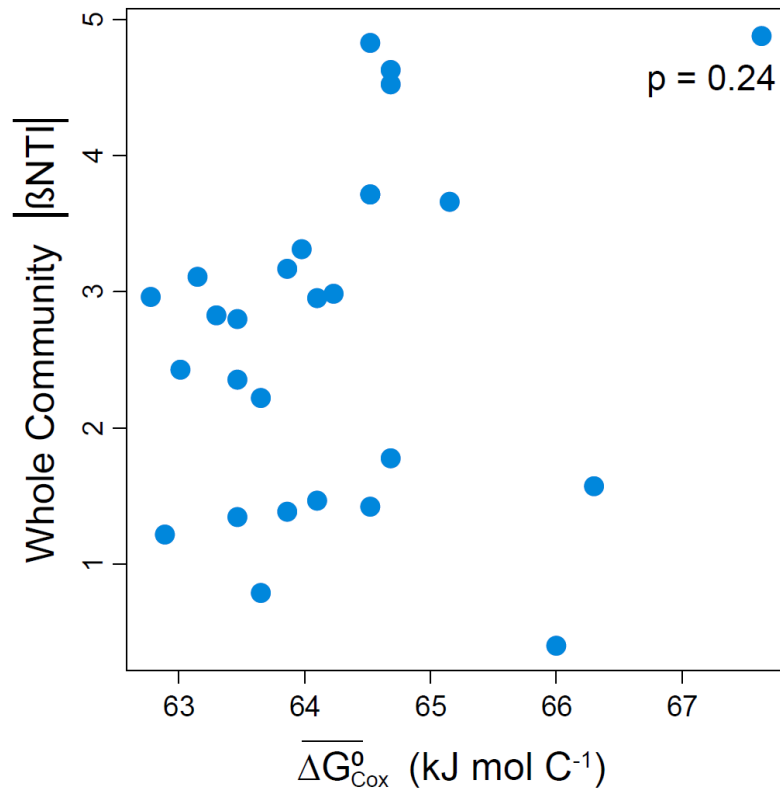

1014  
1015  
1016  
1017  
1018

**Supplementary Figure S6. Community assembly as a function of organic matter thermodynamics.** The strength of deterministic assembly associated with the whole community as measured by  $\beta\text{NTI}$  was not related to organic matter thermodynamics.



1019

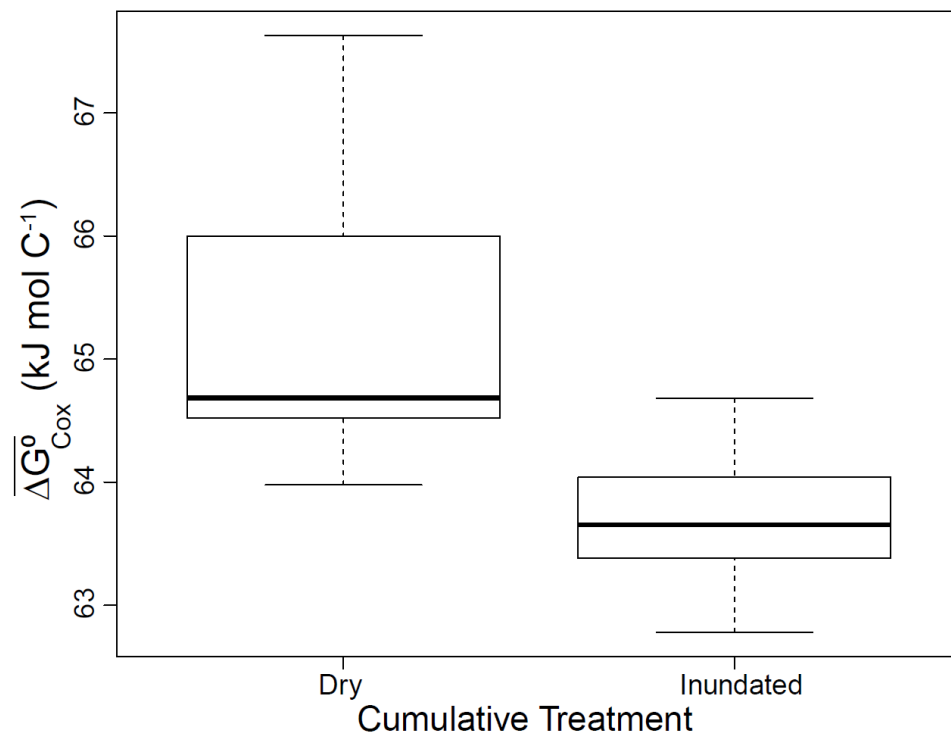

1020

1021 **Supplementary Figure S7. Boxplot representations of organic matter thermodynamics**  
1022 **across two different categories of disturbance.** On the horizontal axis, 'Dry' indicates data  
1023 combined from across treatments with 31 or 34 cumulative dry days, while 'Inundated' indicates  
1024 data combined from across treatments with 0-27 cumulative dry days. The two distributions  
1025 were significantly different per a pairwise Mann-Whitney test ( $W = 189$ ,  $p = < 0.001$ ).

1026

1027 **Data file S1. Time series of moisture content within vial batch reactors.** Columns indicate  
1028 the date (month/day/year), sample name that maps to the metadata file found on ESS-DIVE, the  
1029 number of inundated/dessicated transitions (referred to as cycles for compatibility with R  
1030 Scripts provided in ESS-DIVE data package), the estimated dry sediment mass in grams, and  
1031 the mass of water in grams per gram of dry sediment.
